# Supplementary material for: Heteroleptic ruthenium(ii) chromophores based on tunable polytopic 4′-(benzamidinato)-2,2′:6′,2′′-terpyridines
Source: Royal Society of Chemistry journal article supplement (doi:10.1039/c6dt03169b), 2016-01-01
Supplement: c6dt03169b1.pdf [file c6dt03169b1.pdf]

# Heteroleptic Ruthenium(II) chromophores based on tunable polytopic 4' (amidinato)-2,2':6',2''- terpyridines

Michael W. Cooke,<sup>a,b</sup> Marie-Pierre Santoni<sup>c,\*</sup> Bernold Hasenknopf<sup>d</sup> and Garry S. Hanan<sup>a,\*</sup>

<sup>a</sup> Department of Chemistry, Université de Montréal, Québec, H3T 1J4, Canada

<sup>b</sup> Radiation Surveillance Division, Radiation Protection Bureau of Health Canada, 775 Brookfield Road Ottawa ON Canada K1A 1C1

<sup>c</sup> ITODYS, UMR CNRS 7086, Université Paris Diderot, Sorbonne Paris Cité, 75013 Paris

<sup>d</sup> Sorbonne Universités, UPMC Univ. Paris6, Institut Parisien de Chimie Moléculaire, CNRS UMR 8232, 4 Place Jussieu, 75005 Paris, France

## Electronic Supporting Information

### Summary

|                                                                                                            |    |
|------------------------------------------------------------------------------------------------------------|----|
| NMR spectroscopy in solution at variable temperature.....                                                  | 2  |
| Fig. S1. <sup>1</sup> H NMR of complex <b>1</b> in CD <sub>3</sub> CN at r.t. (aromatic region).....       | 3  |
| Fig. S2. <sup>1</sup> H NMR of complex <b>1</b> in CD <sub>3</sub> CN at r.t. (aliphatic region).....      | 3  |
| Fig. S3. <sup>1</sup> H NMR of complex <b>1</b> in CD <sub>3</sub> CN at 330 K (aromatic region).....      | 4  |
| Fig. S4. <sup>1</sup> H NMR of complex <b>1</b> in CD <sub>3</sub> CN at 330 K (aliphatic region).....     | 4  |
| Fig. S5. <sup>1</sup> H NMR of complex <b>2</b> in CD <sub>3</sub> CN at r.t. (aromatic region).....       | 5  |
| Fig. S6. <sup>1</sup> H NMR of complex <b>2</b> in CD <sub>3</sub> CN at 330 K (aromatic region).....      | 5  |
| Fig. S7. <sup>1</sup> H NMR of <b>2</b> in CD <sub>3</sub> CN.....                                         | 6  |
| Electrochemistry.....                                                                                      | 7  |
| Fig. S8. Cyclic voltammograms of <b>1</b> and <b>2</b> in CH <sub>3</sub> CN (100 mVs <sup>-1</sup> )..... | 7  |
| Spectroscopic determination of ground-state pKa values.....                                                | 7  |
| Fig. S9. Spectrophotometric titration of <b>1</b> .....                                                    | 8  |
| Fig. S10. Spectrophotometric titration of <b>2</b> .....                                                   | 9  |
| X-ray crystallography.....                                                                                 | 10 |

|                                                                   |    |
|-------------------------------------------------------------------|----|
| Fig. S11. ORTEP of one of the unique complexes of <b>1</b> .....  | 10 |
| Table S1. Crystallographic data and parameters for <b>1</b> ..... | 10 |
| Fig. S12. Crystal structure of <b>1</b> .....                     | 11 |
| Table S2. Atomic coord. and equiv. iso. displacement param.....   | 12 |
| Table S3. Hydrogen coord. and iso. displacement parameters.....   | 16 |
| Table S4. Anisotropic parameters for <b>1</b> .....               | 19 |
| Table S5. Bond lengths and angles for <b>1</b> .....              | 23 |
| Table S6. Hydrogen bonding parameters for <b>1</b> .....          | 28 |

## NMR spectroscopy in solution at variable temperature

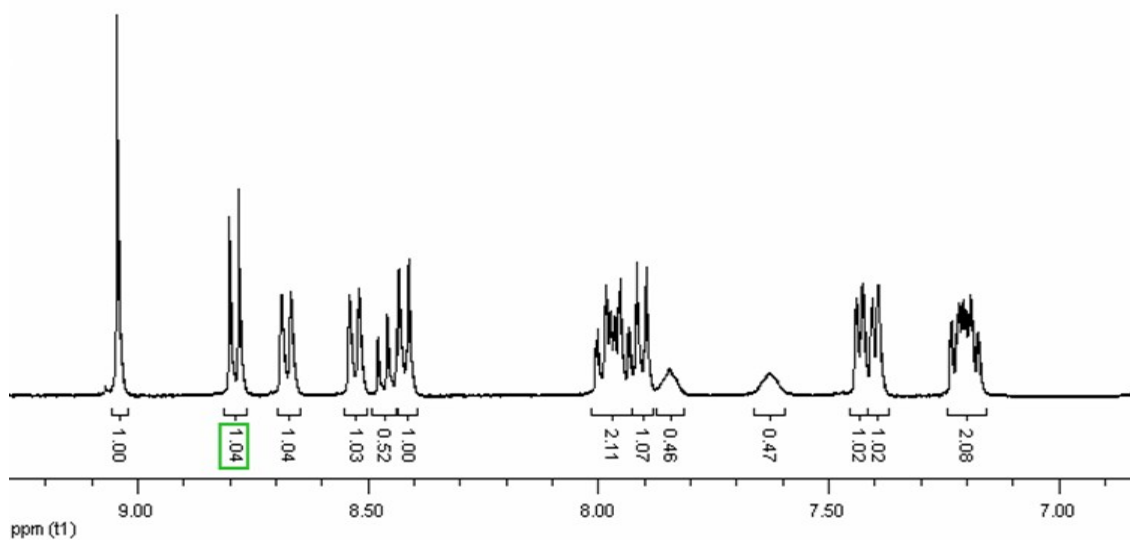

**Figure S1.** <sup>1</sup>H NMR of complex **1** in CD<sub>3</sub>CN at r.t. (aromatic region).

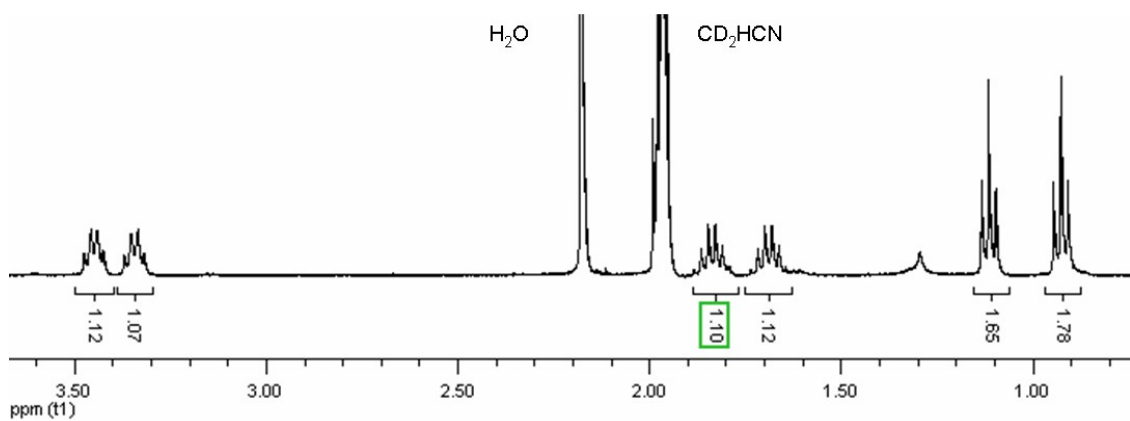

**Figure S2.** <sup>1</sup>H NMR of complex **1** in CD<sub>3</sub>CN at r.t. (aliphatic region).

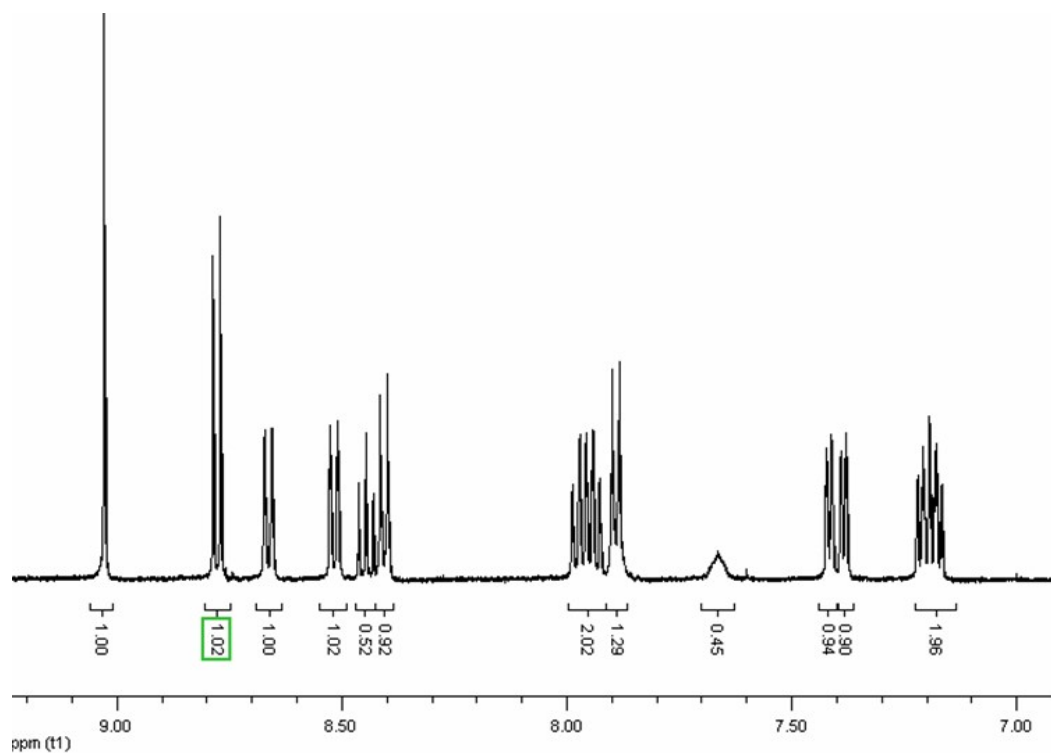

**Figure S3.**  $^1\text{H}$  NMR of complex 1 in  $\text{CD}_3\text{CN}$  at 330 K (aromatic region).

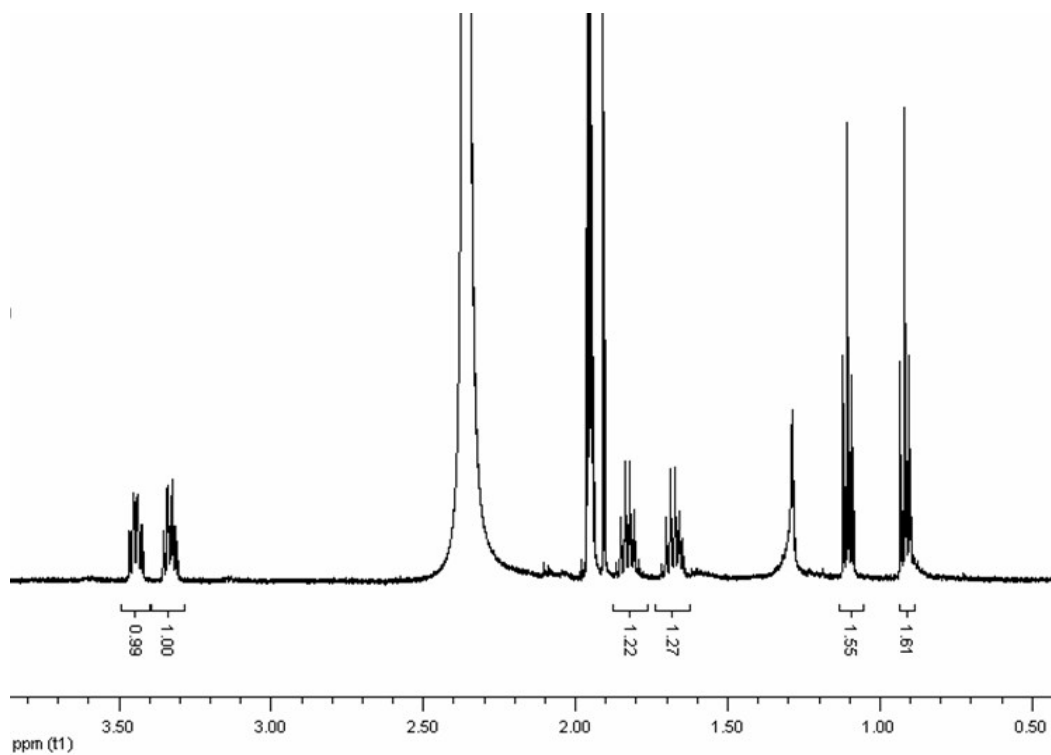

**Figure S4.**  $^1\text{H}$  NMR of complex 1 in  $\text{CD}_3\text{CN}$  at 330 K (aliphatic region).

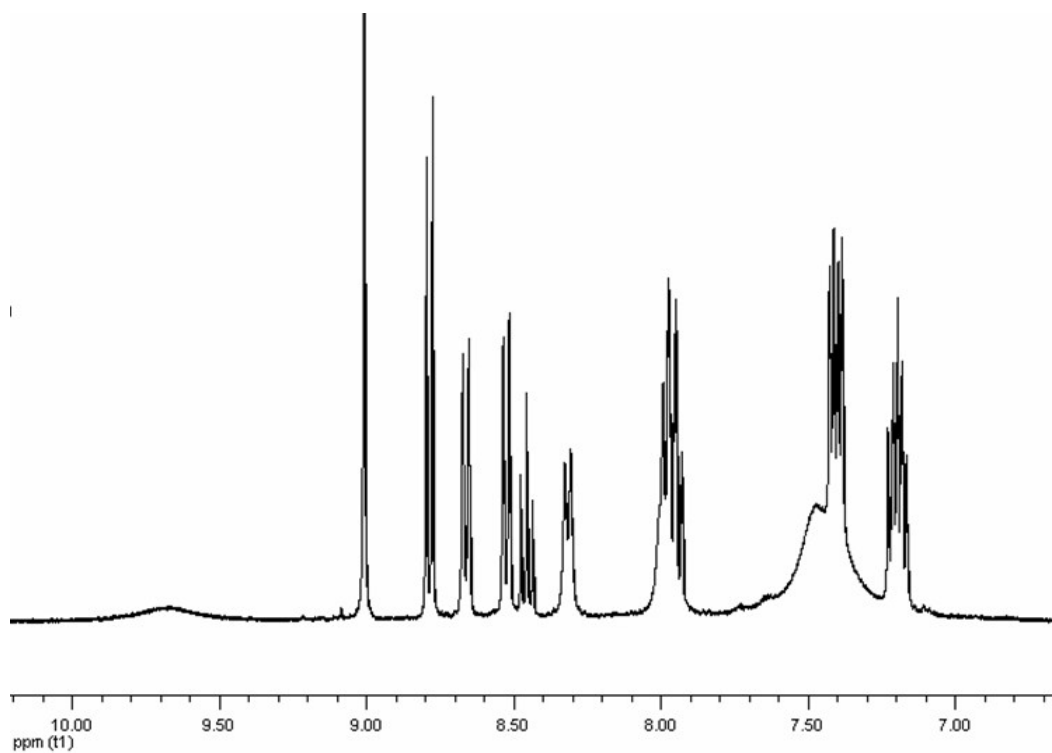

**Figure S5.**  $^1\text{H}$  NMR of complex **2** in  $\text{CD}_3\text{CN}$  at r.t. (aromatic region).

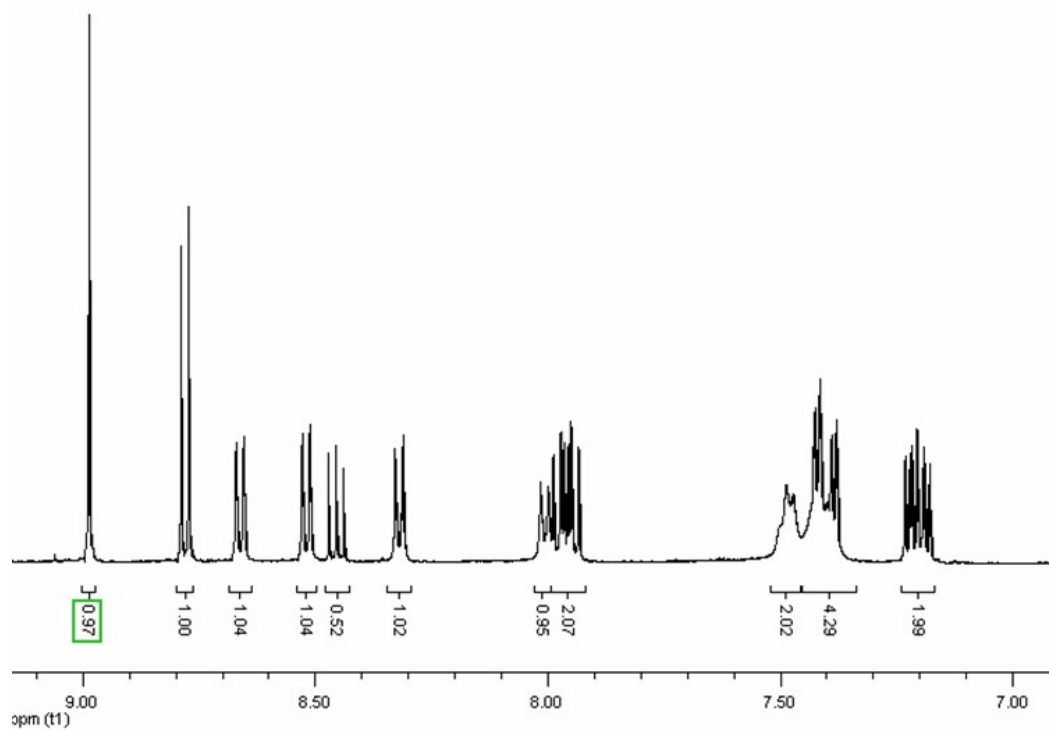

**Figure S6.**  $^1\text{H}$  NMR of complex **2** in  $\text{CD}_3\text{CN}$  at 330 K (aromatic region).

A)

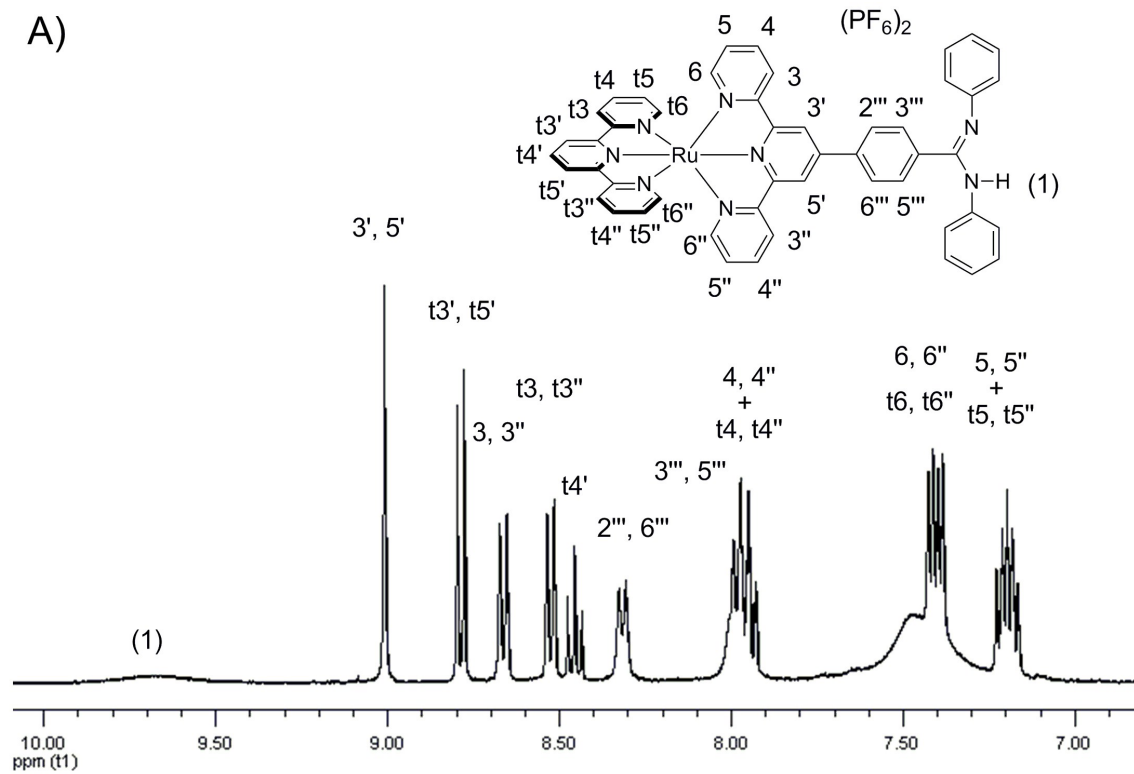

B)

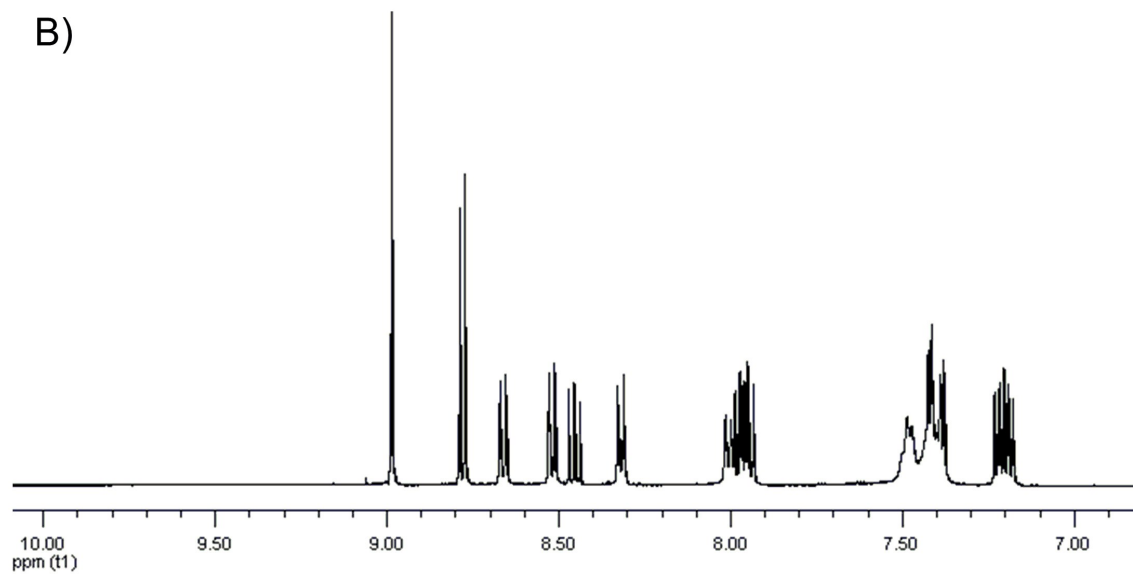

Figure S7.  $^1H$  NMR of **2** in  $CD_3CN$  at: A) 298 K and B) 330 K.

## Electrochemistry

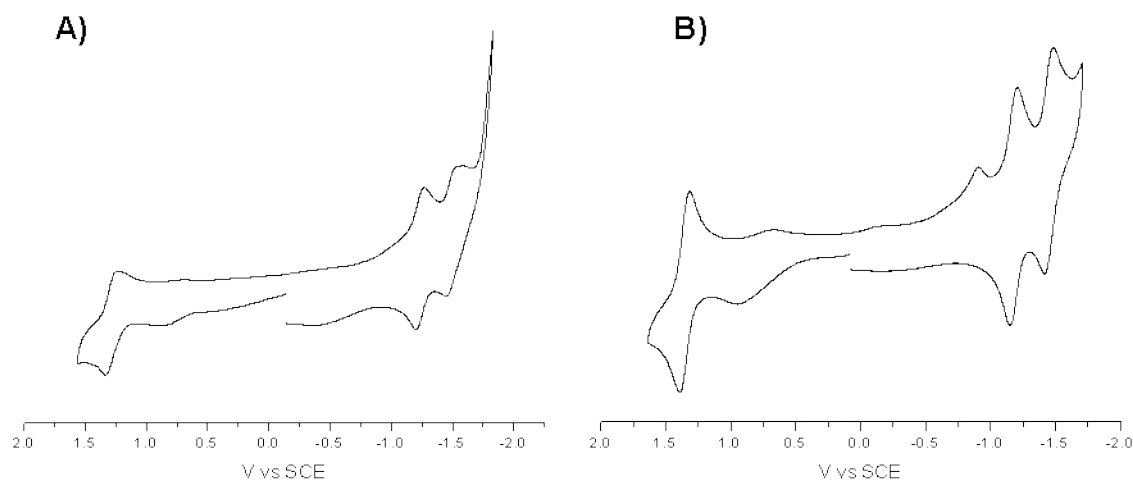

**Figure S8.** Cyclic voltammograms of **1** (A) and **2** (B) in 0.1 M TBAPF<sub>6</sub> CH<sub>3</sub>CN solution at 100 mVs<sup>-1</sup>.

## Spectrophotometric and spectrofluorimetric determination of ground-state pKa values

The ground-state pKa values for complexes **1-4** were determined by UV-Vis and emission measurements over the range of pH = 2-13. Stock solutions (1, 4.6 x 10<sup>-5</sup> M; 2, 5.1 x 10<sup>-5</sup> M; 3, 5.1 x 10<sup>-5</sup> M; 4, 6.1 x 10<sup>-5</sup> M) were prepared in 100 mL of H<sub>2</sub>O containing 20% DMSO and 0.1 M KCl, for solubility. The pH of the solution was initially adjusted by addition of 0.2 M NaOH(aq) and subsequently lowered by careful addition of HCl(aq) solution (total volume change kept negligible).

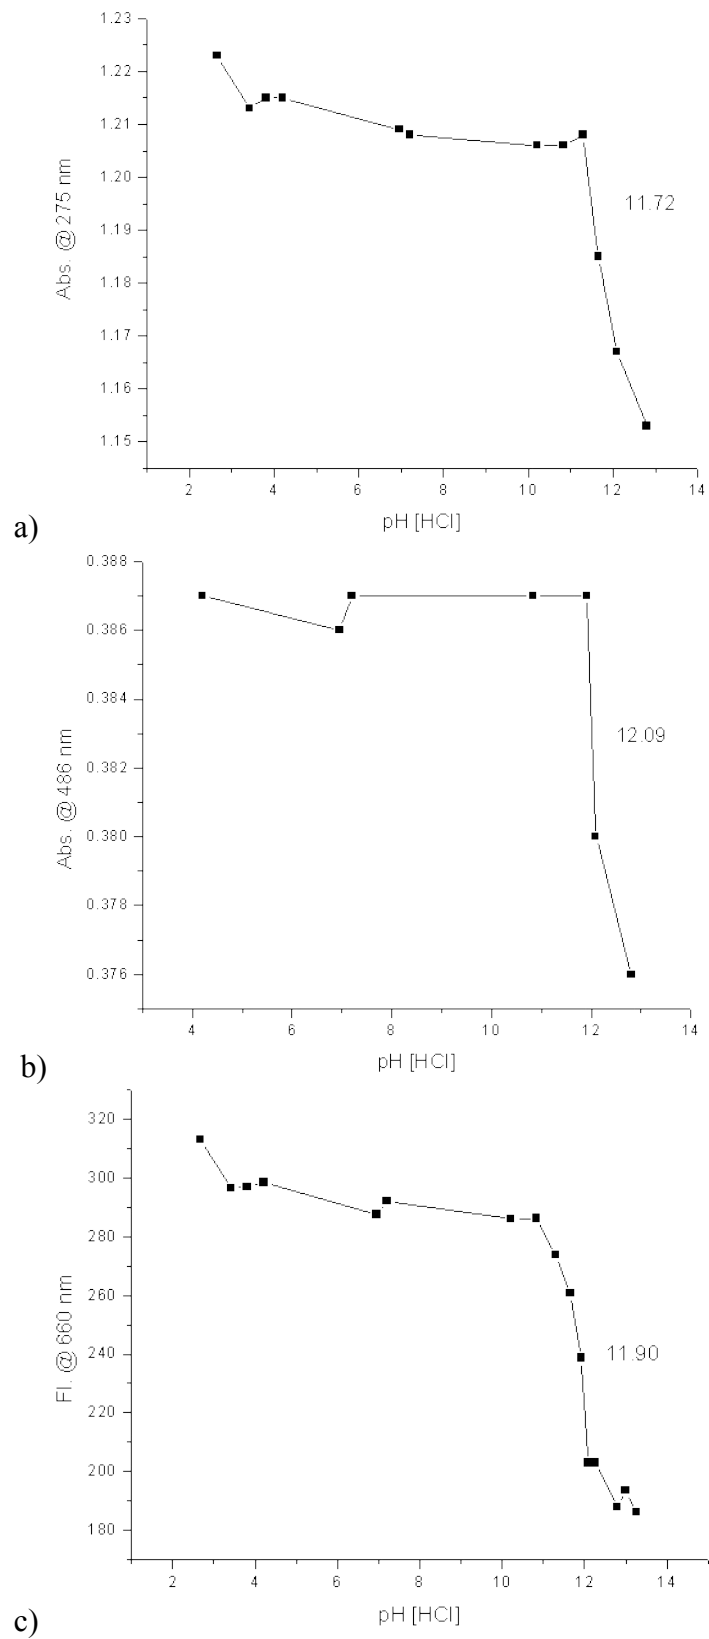

**Figure S9.** Spectrophotometric titration of **1** at: a) 275 nm; b) 486 nm; c) 660 nm.



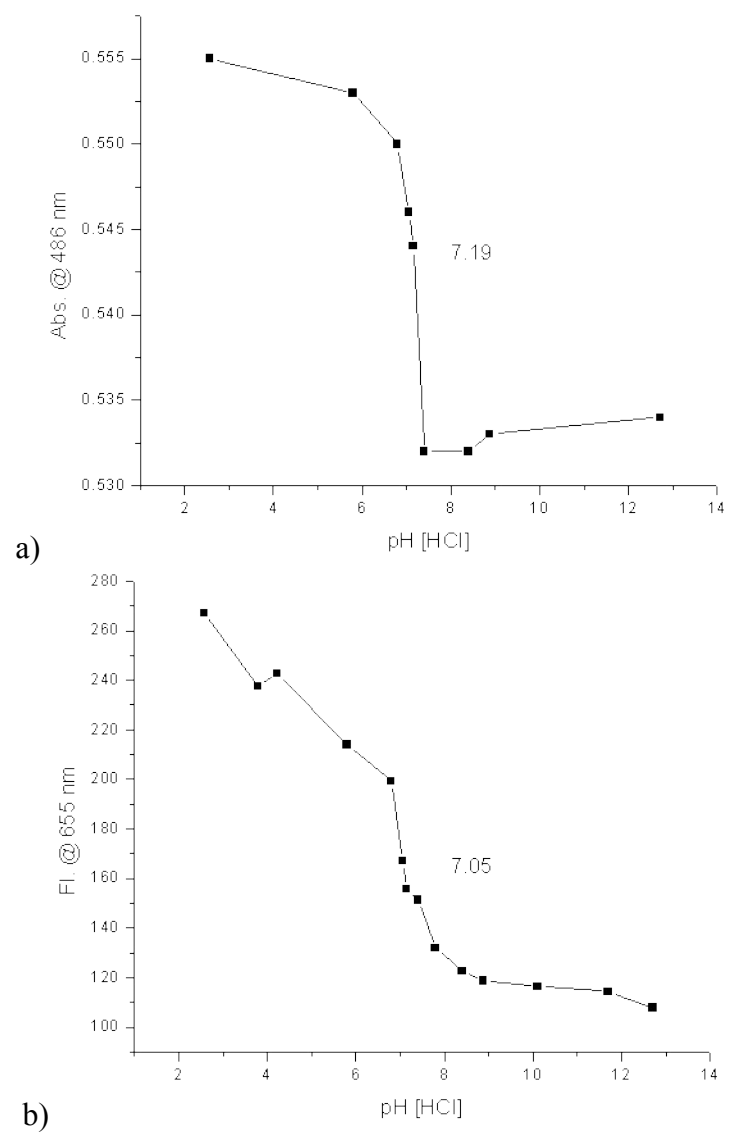

**Figure S10.** Spectrophotometric titration of **2** at: a) 486 nm; b) 665 nm.

The structure was deposited to the Cambridge Crystallographic Data Centre and was allocated the respective deposition number CCDC 1495788. Full details on data collection strategy and structure resolution can be found in the CIF file.

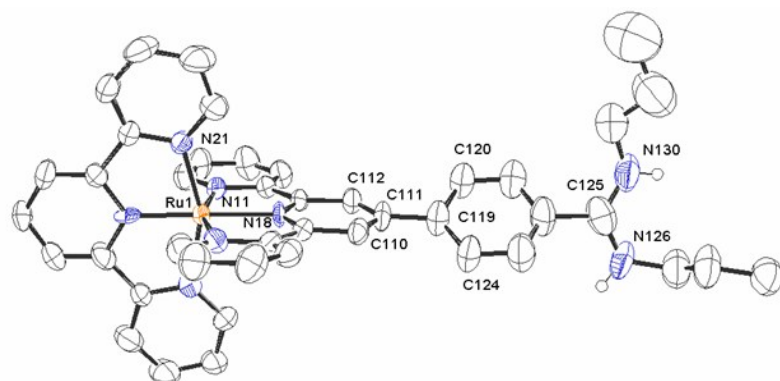

#### Selected Parameters

$$\begin{aligned} N_{11}\text{-Ru-}N_{21} &= 96.1(2)^\circ \\ N_{11}\text{-Ru-}N_{18} &= 79.9(2)^\circ \\ \text{Tpy-ph}_{(\text{torsion})} &= 44.0^\circ_{(\text{av})} \\ N_{18}\text{-Ru} &= 2.038(5) \text{ \AA} \\ N_{11}\text{-Ru} &= 2.083(6) \text{ \AA} \\ C_{125}\text{-}N_{130} &= 1.318(8) \text{ \AA} \\ C_{125}\text{-}N_{126} &= 1.313(8) \text{ \AA} \end{aligned}$$

**Figure S11.** ORTEP of one of the unique complexes constituting the asymmetric unit of **1** (thermal ellipsoids drawn at 50 % probability). Hydrogens, solvent and counter-ions are omitted for clarity.

**Table S1.** Crystallographic data and parameters for **1** ([1-H](BPh<sub>4</sub>)<sub>2</sub>(PF<sub>6</sub>))

|                                                                   |                                                                                  |
|-------------------------------------------------------------------|----------------------------------------------------------------------------------|
| <b>Formula</b>                                                    | C <sub>91</sub> H <sub>81</sub> B <sub>2</sub> F <sub>6</sub> N <sub>8</sub> PRu |
| <b>M<sub>v</sub> (g/mol); F(000)</b>                              | 1554.30; 3224                                                                    |
| <b>T (K); wavelength (Å)</b>                                      | 220(2); 1.54178                                                                  |
| <b>Crystal System</b>                                             | Monoclinic                                                                       |
| <b>Space Group</b>                                                | P2 <sub>1</sub>                                                                  |
| <b>Unit Cell: a (Å)</b>                                           | 18.6928(8)                                                                       |
| <b>b (Å)</b>                                                      | 22.4646(7)                                                                       |
| <b>c (Å)</b>                                                      | 21.6484(8)                                                                       |
| <b>β (°)</b>                                                      | 94.336(3)                                                                        |
| <b>V (Å<sup>3</sup>); Z; d<sub>calcd</sub> (g/cm<sup>3</sup>)</b> | 9064.7(6); 4; 1.139                                                              |
| <b>θ range (°); completeness</b>                                  | 2.05 to 72.81; 0.979                                                             |
| <b>collected reflections; R<sub>σ</sub></b>                       | 72843; 0.0901                                                                    |
| <b>unique reflections; R<sub>int</sub></b>                        | 33931; 0.027                                                                     |
| <b>μ (mm<sup>-1</sup>); Abs. Corr.</b>                            | 2.033; Multi-scan                                                                |
| <b>R<sub>1</sub>(F); wR(F<sup>2</sup>) [I &gt; 2σ(I)]</b>         | 0.0647; 0.1421                                                                   |
| <b>R<sub>1a</sub>(F); wR(F<sup>2</sup>) (all data)</b>            | 0.1058; 0.1564                                                                   |
| <b>GoF(F<sup>2</sup>)</b>                                         | 0.857                                                                            |
| <b>Residual electron density (e<sup>-</sup>/Å<sup>3</sup>)</b>    | 1.785; -0.571                                                                    |

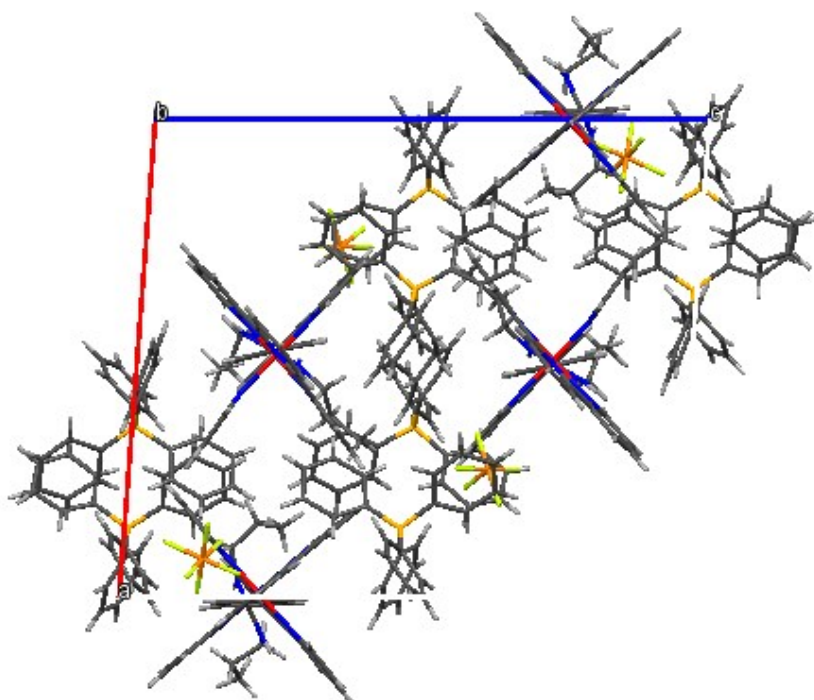

(a)

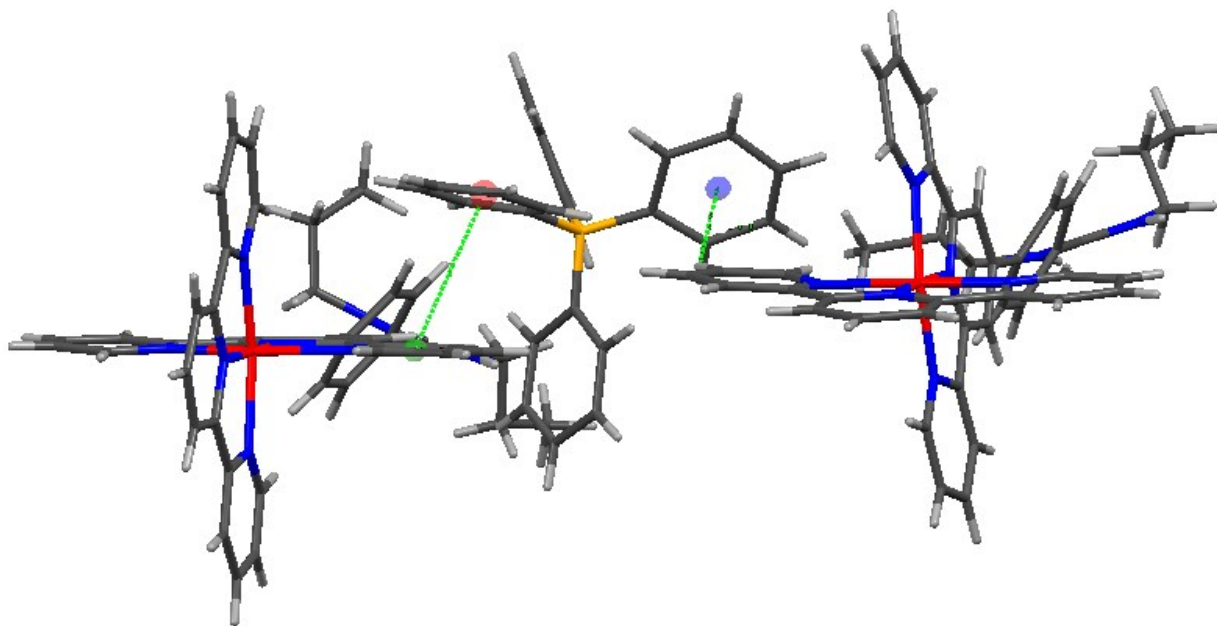

(b)

**Figure S12.** Crystal structure of **1**. (a) Packing view of unit cell along b axis, showing alternance of cations and anions. (b) Capped-sticks view showing inter-annular interactions (“face-to-face” and “edge-to-face”) between phenyl rings of one  $\text{BPh}_4^-$  anion and of the two independent cations within the asymmetric unit.

**Table S2.** Atomic coordinates ( $\times 10^4$ ) and equivalent isotr. displacement parameters ( $\text{\AA}^2 \times 10^3$ ) for **1**.  
 $U_{eq}$  is defined as one third of the trace of the orthogonalized  $U_{ij}$  tensor.

|         | x        | y        | z        | $U_{eq}$ |
|---------|----------|----------|----------|----------|
| Ru (1)  | 4954 (1) | 1315 (1) | 2495 (1) | 36 (1)   |
| N (11)  | 4167 (3) | 1481 (2) | 3105 (3) | 45 (2)   |
| C (12)  | 3789 (4) | 1093 (3) | 3397 (4) | 51 (2)   |
| C (13)  | 3255 (4) | 1261 (4) | 3761 (4) | 66 (2)   |
| C (14)  | 3093 (5) | 1859 (4) | 3826 (4) | 71 (2)   |
| C (15)  | 3492 (4) | 2273 (3) | 3520 (3) | 53 (2)   |
| C (16)  | 4018 (4) | 2085 (3) | 3163 (3) | 43 (2)   |
| C (17)  | 4481 (4) | 2473 (3) | 2821 (3) | 37 (2)   |
| N (18)  | 4947 (3) | 2222 (2) | 2484 (2) | 35 (2)   |
| C (19)  | 5384 (4) | 2483 (3) | 2139 (3) | 37 (2)   |
| C (110) | 5357 (4) | 3117 (3) | 2117 (3) | 42 (2)   |
| C (111) | 4891 (4) | 3428 (3) | 2459 (3) | 49 (2)   |
| C (112) | 4444 (4) | 3103 (3) | 2816 (3) | 44 (2)   |
| C (113) | 5872 (4) | 2099 (3) | 1829 (3) | 42 (2)   |
| N (114) | 5747 (3) | 1493 (3) | 1904 (3) | 48 (2)   |
| C (115) | 6180 (4) | 1114 (4) | 1670 (4) | 60 (2)   |
| C (116) | 6773 (4) | 1283 (4) | 1335 (4) | 71 (2)   |
| C (117) | 6909 (4) | 1891 (4) | 1260 (4) | 70 (2)   |
| C (118) | 6444 (4) | 2295 (3) | 1522 (3) | 50 (2)   |
| C (119) | 4850 (4) | 4084 (3) | 2441 (4) | 62 (2)   |
| C (120) | 4726 (4) | 4411 (3) | 2983 (4) | 68 (2)   |
| C (121) | 4706 (4) | 5018 (4) | 2998 (5) | 81 (2)   |
| C (122) | 4848 (5) | 5322 (3) | 2450 (5) | 79 (3)   |
| C (123) | 5010 (5) | 5016 (4) | 1924 (4) | 84 (3)   |
| C (124) | 4991 (4) | 4409 (3) | 1923 (4) | 66 (2)   |
| C (125) | 4855 (5) | 6012 (4) | 2442 (4) | 85 (3)   |
| N (126) | 4528 (4) | 6264 (3) | 1952 (3) | 84 (2)   |
| C (127) | 4517 (4) | 6898 (3) | 1832 (4) | 92 (3)   |
| C (128) | 5198 (4) | 7121 (3) | 1655 (5) | 93 (3)   |
| C (129) | 5215 (5) | 7791 (3) | 1517 (4) | 95 (3)   |
| N (130) | 5158 (4) | 6314 (3) | 2914 (3) | 85 (2)   |
| C (131) | 5654 (5) | 6104 (4) | 3406 (4) | 104 (3)  |
| C (132) | 6231 (6) | 6524 (5) | 3574 (6) | 149 (5)  |
| C (133) | 6728 (7) | 6253 (6) | 4130 (6) | 189 (6)  |
| N (21)  | 5763 (3) | 1107 (2) | 3171 (3) | 37 (1)   |
| C (22)  | 6222 (4) | 1489 (4) | 3469 (4) | 55 (2)   |
| C (23)  | 6783 (4) | 1313 (5) | 3872 (4) | 72 (3)   |
| C (24)  | 6910 (4) | 687 (4)  | 3955 (4) | 66 (3)   |
| C (25)  | 6434 (4) | 297 (3)  | 3642 (4) | 56 (2)   |
| C (26)  | 5876 (4) | 511 (3)  | 3255 (3) | 42 (2)   |
| C (27)  | 5356 (4) | 115 (3)  | 2894 (3) | 46 (2)   |
| N (28)  | 4906 (3) | 453 (3)  | 2506 (2) | 42 (2)   |
| C (29)  | 4392 (4) | 149 (4)  | 2135 (4) | 53 (2)   |
| C (210) | 4321 (5) | -441 (3) | 2163 (4) | 67 (3)   |
| C (211) | 4769 (5) | -782 (4) | 2562 (4) | 72 (3)   |
| C (212) | 5304 (4) | -479 (3) | 2929 (4) | 63 (2)   |
| C (213) | 3956 (4) | 578 (3)  | 1745 (3) | 42 (2)   |
| N (214) | 4148 (3) | 1163 (3) | 1808 (3) | 43 (2)   |

|        |           |          |          |         |
|--------|-----------|----------|----------|---------|
| C(215) | 3778(4)   | 1573(3)  | 1462(3)  | 52(2)   |
| C(216) | 3228(4)   | 1429(4)  | 1036(4)  | 59(2)   |
| C(217) | 3031(5)   | 827(4)   | 959(4)   | 72(3)   |
| C(218) | 3401(5)   | 409(4)   | 1317(4)  | 64(3)   |
| Ru(3)  | 10077(1)  | 61(1)    | 7499(1)  | 42(1)   |
| N(31)  | 9263(3)   | 208(2)   | 6824(3)  | 45(2)   |
| C(32)  | 8890(4)   | -194(3)  | 6481(3)  | 48(2)   |
| C(33)  | 8340(4)   | -39(4)   | 6062(4)  | 63(2)   |
| C(34)  | 8162(4)   | 541(3)   | 5966(4)  | 56(2)   |
| C(35)  | 8546(4)   | 974(3)   | 6303(4)  | 52(2)   |
| C(36)  | 9115(4)   | 790(3)   | 6726(3)  | 44(2)   |
| C(37)  | 9544(4)   | 1198(3)  | 7095(3)  | 36(2)   |
| N(38)  | 10044(3)  | 967(3)   | 7487(3)  | 48(2)   |
| C(39)  | 10506(4)  | 1234(3)  | 7879(3)  | 38(2)   |
| C(310) | 10473(4)  | 1870(3)  | 7907(3)  | 51(2)   |
| C(311) | 9960(4)   | 2164(4)  | 7507(3)  | 50(2)   |
| C(312) | 9509(4)   | 1833(3)  | 7087(3)  | 49(2)   |
| C(313) | 10993(4)  | 866(3)   | 8266(3)  | 44(2)   |
| N(314) | 10901(3)  | 267(2)   | 8172(3)  | 40(2)   |
| C(315) | 11320(4)  | -108(3)  | 8514(3)  | 51(2)   |
| C(316) | 11877(4)  | 105(4)   | 8930(3)  | 51(2)   |
| C(317) | 11969(5)  | 682(4)   | 9006(4)  | 64(2)   |
| C(318) | 11542(4)  | 1078(3)  | 8676(3)  | 46(2)   |
| C(319) | 9917(3)   | 2823(3)  | 7516(3)  | 49(2)   |
| C(320) | 9873(4)   | 3098(3)  | 8092(4)  | 66(2)   |
| C(321) | 9803(4)   | 3710(3)  | 8130(4)  | 72(2)   |
| C(322) | 9817(4)   | 4047(3)  | 7598(4)  | 70(2)   |
| C(323) | 9865(5)   | 3778(4)  | 7032(4)  | 88(3)   |
| C(324) | 9920(4)   | 3157(3)  | 6984(4)  | 64(2)   |
| C(325) | 9744(5)   | 4710(3)  | 7645(5)  | 103(3)  |
| N(326) | 9159(4)   | 4947(3)  | 7373(5)  | 138(4)  |
| C(327) | 8999(6)   | 5576(4)  | 7340(6)  | 144(5)  |
| C(328) | 8582(8)   | 5732(5)  | 7868(6)  | 177(6)  |
| C(329) | 8284(9)   | 6382(6)  | 7721(8)  | 272(9)  |
| N(330) | 10285(4)  | 5044(4)  | 7878(4)  | 119(3)  |
| C(331) | 11009(5)  | 4844(4)  | 8046(6)  | 127(4)  |
| C(332) | 11529(8)  | 4928(8)  | 7600(8)  | 252(10) |
| C(333) | 11450(13) | 5487(9)  | 7184(10) | 338(14) |
| N(41)  | 9344(3)   | -105(3)  | 8168(3)  | 53(2)   |
| C(42)  | 9029(5)   | 301(4)   | 8489(4)  | 79(3)   |
| C(43)  | 8597(7)   | 162(6)   | 8922(6)  | 127(4)  |
| C(44)  | 8450(7)   | -453(6)  | 9035(6)  | 124(4)  |
| C(45)  | 8799(5)   | -860(4)  | 8703(5)  | 79(3)   |
| C(46)  | 9254(5)   | -688(4)  | 8272(4)  | 58(2)   |
| C(47)  | 9642(5)   | -1104(4) | 7914(4)  | 57(2)   |
| N(48)  | 10075(3)  | -797(4)  | 7511(3)  | 52(2)   |
| C(49)  | 10476(4)  | -1127(4) | 7129(4)  | 55(2)   |
| C(410) | 10449(5)  | -1722(4) | 7107(5)  | 75(3)   |
| C(411) | 10062(5)  | -2004(6) | 7504(5)  | 92(4)   |
| C(412) | 9650(5)   | -1701(4) | 7924(5)  | 78(3)   |
| C(413) | 10876(4)  | -722(3)  | 6741(4)  | 50(2)   |
| N(414) | 10797(3)  | -128(3)  | 6845(3)  | 48(2)   |
| C(415) | 11152(5)  | 251(4)   | 6517(4)  | 63(2)   |
| C(416) | 11589(5)  | 73(5)    | 6076(4)  | 85(3)   |
| C(417) | 11677(5)  | -542(5)  | 5957(5)  | 87(3)   |
| C(418) | 11307(5)  | -926(4)  | 6317(4)  | 75(3)   |
| B(5)   | 3574(4)   | 8832(3)  | 9948(4)  | 40(2)   |

|         |          |           |           |         |
|---------|----------|-----------|-----------|---------|
| C (511) | 3085 (4) | 8799 (3)  | 9272 (3)  | 43 (2)  |
| C (512) | 2439 (4) | 8477 (3)  | 9217 (4)  | 51 (2)  |
| C (513) | 2053 (4) | 8386 (3)  | 8654 (4)  | 61 (2)  |
| C (514) | 2311 (5) | 8635 (4)  | 8107 (4)  | 69 (3)  |
| C (515) | 2929 (5) | 8953 (4)  | 8142 (4)  | 73 (3)  |
| C (516) | 3324 (4) | 9023 (3)  | 8742 (3)  | 50 (2)  |
| C (521) | 3069 (4) | 8806 (3)  | 10529 (4) | 47 (2)  |
| C (522) | 3294 (5) | 8482 (4)  | 11102 (4) | 58 (2)  |
| C (523) | 2888 (5) | 8514 (4)  | 11584 (4) | 77 (3)  |
| C (524) | 2246 (6) | 8838 (5)  | 11602 (5) | 85 (3)  |
| C (525) | 2054 (5) | 9163 (4)  | 11064 (5) | 75 (3)  |
| C (526) | 2434 (4) | 9148 (4)  | 10539 (4) | 55 (2)  |
| C (531) | 4039 (4) | 9462 (3)  | 10050 (4) | 49 (2)  |
| C (532) | 4593 (4) | 9495 (4)  | 10501 (4) | 58 (2)  |
| C (533) | 4963 (5) | 10005 (5) | 10642 (4) | 74 (3)  |
| C (534) | 4807 (5) | 10536 (5) | 10303 (5) | 82 (3)  |
| C (535) | 4274 (5) | 10521 (4) | 9854 (4)  | 74 (3)  |
| C (536) | 3886 (4) | 9988 (4)  | 9740 (4)  | 58 (2)  |
| C (541) | 4140 (4) | 8268 (3)  | 9913 (3)  | 50 (2)  |
| C (542) | 4821 (4) | 8330 (3)  | 9699 (4)  | 57 (2)  |
| C (543) | 5271 (5) | 7848 (4)  | 9643 (5)  | 80 (3)  |
| C (544) | 5071 (6) | 7269 (4)  | 9772 (5)  | 78 (3)  |
| C (545) | 4373 (5) | 7196 (3)  | 9967 (4)  | 73 (3)  |
| C (546) | 3925 (4) | 7686 (3)  | 10039 (3) | 52 (2)  |
| B (6)   | 6444 (4) | 8790 (3)  | 5084 (4)  | 39 (2)  |
| C (611) | 6049 (4) | 9443 (3)  | 5067 (4)  | 52 (2)  |
| C (612) | 6314 (5) | 9946 (4)  | 5367 (4)  | 76 (3)  |
| C (613) | 5958 (6) | 10502 (5) | 5295 (6)  | 101 (4) |
| C (614) | 5346 (6) | 10559 (5) | 4922 (6)  | 94 (4)  |
| C (615) | 5073 (5) | 10066 (5) | 4603 (5)  | 92 (3)  |
| C (616) | 5417 (5) | 9527 (4)  | 4682 (4)  | 66 (3)  |
| C (621) | 6851 (4) | 8762 (3)  | 4453 (4)  | 51 (2)  |
| C (622) | 7494 (5) | 9055 (4)  | 4380 (4)  | 66 (2)  |
| C (623) | 7816 (6) | 9092 (5)  | 3821 (5)  | 90 (3)  |
| C (624) | 7498 (8) | 8802 (6)  | 3313 (5)  | 114 (4) |
| C (625) | 6849 (6) | 8497 (4)  | 3369 (5)  | 94 (3)  |
| C (626) | 6549 (5) | 8491 (3)  | 3896 (4)  | 61 (2)  |
| C (631) | 7037 (4) | 8694 (3)  | 5705 (4)  | 50 (2)  |
| C (632) | 6903 (5) | 8928 (4)  | 6264 (4)  | 65 (2)  |
| C (633) | 7388 (7) | 8804 (5)  | 6811 (5)  | 97 (4)  |
| C (634) | 7961 (6) | 8417 (6)  | 6735 (7)  | 113 (5) |
| C (635) | 8096 (5) | 8204 (5)  | 6175 (5)  | 93 (4)  |
| C (636) | 7622 (4) | 8342 (4)  | 5669 (4)  | 62 (2)  |
| C (641) | 5861 (4) | 8250 (3)  | 5166 (3)  | 50 (2)  |
| C (642) | 5962 (4) | 7668 (3)  | 4964 (3)  | 59 (2)  |
| C (643) | 5483 (5) | 7207 (3)  | 5061 (4)  | 75 (3)  |
| C (644) | 4894 (5) | 7300 (4)  | 5375 (4)  | 80 (3)  |
| C (645) | 4791 (5) | 7866 (4)  | 5615 (4)  | 76 (3)  |
| C (646) | 5264 (4) | 8331 (4)  | 5497 (4)  | 62 (2)  |
| B (7)   | 8565 (5) | 7680 (4)  | 59 (5)    | 56 (3)  |
| C (711) | 8111 (4) | 7656 (3)  | 660 (4)   | 52 (2)  |
| C (712) | 7479 (5) | 7343 (4)  | 654 (4)   | 60 (2)  |
| C (713) | 7077 (5) | 7262 (4)  | 1163 (5)  | 77 (3)  |
| C (714) | 7360 (6) | 7488 (5)  | 1711 (5)  | 84 (3)  |
| C (715) | 7936 (6) | 7799 (4)  | 1752 (5)  | 77 (3)  |
| C (716) | 8312 (5) | 7874 (4)  | 1216 (5)  | 71 (3)  |
| C (721) | 9168 (4) | 8206 (3)  | 54 (4)    | 56 (2)  |

|         |           |          |           |         |
|---------|-----------|----------|-----------|---------|
| C (722) | 9064 (5)  | 8774 (4) | 298 (4)   | 77 (3)  |
| C (723) | 9563 (6)  | 9243 (4) | 253 (5)   | 95 (3)  |
| C (724) | 10175 (6) | 9147 (5) | -29 (5)   | 96 (4)  |
| C (725) | 10304 (5) | 8616 (4) | -304 (5)  | 81 (3)  |
| C (726) | 9799 (5)  | 8154 (4) | -244 (4)  | 72 (3)  |
| C (731) | 8056 (5)  | 7779 (4) | -580 (4)  | 68 (3)  |
| C (732) | 7458 (5)  | 8152 (5) | -588 (5)  | 101 (4) |
| C (733) | 7020 (6)  | 8321 (5) | -1112 (6) | 110 (4) |
| C (734) | 7215 (7)  | 8039 (7) | -1642 (7) | 120 (5) |
| C (735) | 7801 (6)  | 7714 (5) | -1719 (5) | 105 (4) |
| C (736) | 8201 (6)  | 7581 (4) | -1153 (5) | 92 (3)  |
| C (741) | 8979 (4)  | 7015 (3) | 62 (3)    | 47 (2)  |
| C (742) | 8698 (5)  | 6507 (4) | -253 (4)  | 69 (3)  |
| C (743) | 9027 (6)  | 5971 (4) | -195 (5)  | 85 (3)  |
| C (744) | 9670 (6)  | 5889 (4) | 181 (5)   | 84 (3)  |
| C (745) | 9960 (5)  | 6369 (4) | 493 (4)   | 67 (2)  |
| C (746) | 9606 (5)  | 6924 (4) | 433 (4)   | 56 (2)  |
| B (8)   | 8568 (5)  | 2472 (4) | 4972 (5)  | 54 (3)  |
| C (811) | 9034 (4)  | 1852 (3) | 5020 (4)  | 48 (2)  |
| C (812) | 8800 (4)  | 1325 (4) | 4728 (4)  | 57 (2)  |
| C (813) | 9186 (5)  | 801 (4)  | 4798 (5)  | 81 (3)  |
| C (814) | 9807 (6)  | 777 (4)  | 5205 (5)  | 80 (3)  |
| C (815) | 10039 (5) | 1276 (4) | 5489 (4)  | 70 (2)  |
| C (816) | 9657 (4)  | 1803 (4) | 5413 (4)  | 54 (2)  |
| C (821) | 8108 (4)  | 2558 (3) | 4328 (4)  | 53 (2)  |
| C (822) | 7468 (5)  | 2895 (4) | 4251 (4)  | 70 (3)  |
| C (823) | 7100 (5)  | 3008 (4) | 3672 (5)  | 82 (3)  |
| C (824) | 7324 (6)  | 2768 (5) | 3169 (5)  | 87 (3)  |
| C (825) | 7949 (5)  | 2417 (5) | 3180 (5)  | 85 (3)  |
| C (826) | 8327 (5)  | 2320 (4) | 3759 (5)  | 78 (3)  |
| C (831) | 9120 (4)  | 3060 (3) | 5013 (4)  | 55 (2)  |
| C (832) | 9769 (5)  | 3065 (4) | 4754 (4)  | 70 (3)  |
| C (833) | 10233 (5) | 3553 (4) | 4752 (5)  | 90 (3)  |
| C (834) | 10039 (6) | 4058 (5) | 5031 (6)  | 93 (3)  |
| C (835) | 9405 (6)  | 4095 (4) | 5278 (5)  | 86 (3)  |
| C (836) | 8937 (4)  | 3605 (3) | 5292 (4)  | 64 (2)  |
| C (841) | 8050 (4)  | 2436 (3) | 5545 (4)  | 51 (2)  |
| C (842) | 7440 (4)  | 2102 (4) | 5510 (4)  | 61 (2)  |
| C (843) | 7007 (5)  | 1996 (4) | 5984 (4)  | 76 (3)  |
| C (844) | 7212 (5)  | 2255 (4) | 6568 (5)  | 74 (3)  |
| C (845) | 7804 (5)  | 2607 (4) | 6641 (4)  | 68 (2)  |
| C (846) | 8221 (4)  | 2675 (3) | 6136 (4)  | 56 (2)  |
| P (1)   | 2663 (1)  | 9481 (1) | 3520 (2)  | 101 (1) |
| F (11)  | 3065 (3)  | 8997 (3) | 3110 (3)  | 129 (2) |
| F (12)  | 2676 (3)  | 9024 (2) | 4078 (3)  | 111 (2) |
| F (13)  | 3427 (3)  | 9735 (2) | 3770 (3)  | 133 (2) |
| F (14)  | 2660 (4)  | 9944 (3) | 2969 (4)  | 181 (3) |
| F (15)  | 1907 (3)  | 9224 (2) | 3262 (3)  | 140 (2) |
| F (16)  | 2280 (4)  | 9941 (3) | 3906 (4)  | 165 (3) |
| P (2)   | 790 (2)   | 6599 (2) | 8548 (2)  | 133 (1) |
| F (21)  | 474 (4)   | 6395 (3) | 7886 (4)  | 168 (3) |
| F (22)  | 1496 (4)  | 6209 (4) | 8502 (4)  | 196 (3) |
| F (23)  | 1166 (5)  | 7139 (4) | 8223 (5)  | 211 (4) |
| F (24)  | 101 (5)   | 6982 (4) | 8607 (5)  | 221 (4) |
| F (25)  | 412 (5)   | 6038 (3) | 8807 (4)  | 204 (4) |
| F (26)  | 1138 (6)  | 6765 (4) | 9237 (4)  | 226 (4) |

**Table S3.** Hydrogen coordinates ( $\times 10^4$ ) and isotropic displacement parameters ( $\text{\AA}^2 \times 10^3$ ) for **1**.

|        | x     | y     | z    | $U_{eq}$ |
|--------|-------|-------|------|----------|
| H(12)  | 3889  | 685   | 3354 | 61       |
| H(13)  | 2999  | 970   | 3966 | 80       |
| H(14)  | 2724  | 1980  | 4070 | 85       |
| H(15)  | 3399  | 2682  | 3560 | 64       |
| H(110) | 5661  | 3325  | 1866 | 50       |
| H(112) | 4117  | 3301  | 3054 | 53       |
| H(115) | 6097  | 705   | 1727 | 72       |
| H(116) | 7066  | 994   | 1167 | 85       |
| H(117) | 7296  | 2023  | 1043 | 84       |
| H(118) | 6527  | 2706  | 1487 | 60       |
| H(120) | 4654  | 4200  | 3348 | 81       |
| H(121) | 4602  | 5225  | 3358 | 97       |
| H(123) | 5132  | 5225  | 1571 | 101      |
| H(124) | 5077  | 4206  | 1556 | 79       |
| H(126) | 4301  | 6033  | 1680 | 101      |
| H(12A) | 4146  | 6985  | 1500 | 110      |
| H(12B) | 4389  | 7108  | 2205 | 110      |
| H(12C) | 5326  | 6904  | 1287 | 111      |
| H(12D) | 5566  | 7033  | 1990 | 111      |
| H(12E) | 4856  | 7884  | 1183 | 143      |
| H(12F) | 5686  | 7900  | 1394 | 143      |
| H(12G) | 5113  | 8012  | 1885 | 143      |
| H(130) | 5044  | 6689  | 2929 | 102      |
| H(13A) | 5864  | 5728  | 3279 | 125      |
| H(13B) | 5391  | 6024  | 3772 | 125      |
| H(13C) | 6030  | 6905  | 3699 | 179      |
| H(13D) | 6514  | 6596  | 3218 | 179      |
| H(13E) | 6926  | 6572  | 4391 | 283      |
| H(13F) | 7115  | 6029  | 3967 | 283      |
| H(13G) | 6446  | 5991  | 4372 | 283      |
| H(22)  | 6155  | 1898  | 3398 | 66       |
| H(23)  | 7077  | 1595  | 4088 | 87       |
| H(24)  | 7301  | 546   | 4212 | 79       |
| H(25)  | 6493  | -116  | 3695 | 68       |
| H(210) | 3961  | -630  | 1907 | 80       |
| H(211) | 4717  | -1197 | 2587 | 86       |
| H(212) | 5627  | -693  | 3199 | 75       |
| H(215) | 3903  | 1976  | 1517 | 62       |
| H(216) | 2986  | 1728  | 798  | 70       |
| H(217) | 2654  | 715   | 670  | 86       |
| H(218) | 3280  | 5     | 1272 | 77       |
| H(32)  | 9009  | -599  | 6530 | 58       |
| H(33)  | 8081  | -337  | 5837 | 76       |
| H(34)  | 7785  | 647   | 5675 | 67       |
| H(35)  | 8431  | 1379  | 6252 | 63       |
| H(310) | 10786 | 2085  | 8185 | 61       |
| H(312) | 9186  | 2028  | 6802 | 59       |
| H(315) | 11241 | -520  | 8477 | 61       |
| H(316) | 12183 | -164  | 9153 | 62       |



|        |       |       |       |     |
|--------|-------|-------|-------|-----|
| H(317) | 12334 | 823   | 9291  | 77  |
| H(318) | 11617 | 1490  | 8725  | 55  |
| H(320) | 9892  | 2866  | 8454  | 79  |
| H(321) | 9747  | 3893  | 8514  | 87  |
| H(323) | 9862  | 4013  | 6672  | 106 |
| H(324) | 9957  | 2974  | 6598  | 77  |
| H(326) | 8842  | 4705  | 7198  | 166 |
| H(32A) | 8721  | 5668  | 6949  | 173 |
| H(32B) | 9445  | 5807  | 7357  | 173 |
| H(32C) | 8889  | 5728  | 8256  | 212 |
| H(32D) | 8187  | 5451  | 7904  | 212 |
| H(32E) | 8664  | 6627  | 7577  | 407 |
| H(32F) | 8114  | 6554  | 8093  | 407 |
| H(32G) | 7891  | 6360  | 7402  | 407 |
| H(330) | 10195 | 5419  | 7935  | 142 |
| H(33A) | 11182 | 5050  | 8428  | 153 |
| H(33B) | 10991 | 4418  | 8141  | 153 |
| H(33C) | 11517 | 4578  | 7331  | 302 |
| H(33D) | 12005 | 4941  | 7824  | 302 |
| H(33E) | 10948 | 5548  | 7052  | 507 |
| H(33F) | 11721 | 5432  | 6823  | 507 |
| H(33G) | 11632 | 5832  | 7415  | 507 |
| H(42)  | 9114  | 705   | 8408  | 95  |
| H(43)  | 8389  | 462   | 9153  | 152 |
| H(44)  | 8127  | -570  | 9325  | 149 |
| H(45)  | 8725  | -1267 | 8771  | 95  |
| H(410) | 10698 | -1935 | 6817  | 89  |
| H(411) | 10063 | -2422 | 7506  | 110 |
| H(412) | 9388  | -1913 | 8205  | 93  |
| H(415) | 11102 | 661   | 6591  | 76  |
| H(416) | 11831 | 357   | 5851  | 102 |
| H(417) | 11968 | -680  | 5652  | 105 |
| H(418) | 11358 | -1339 | 6265  | 90  |
| H(512) | 2262  | 8317  | 9577  | 61  |
| H(513) | 1627  | 8163  | 8633  | 74  |
| H(514) | 2052  | 8578  | 7722  | 83  |
| H(515) | 3098  | 9125  | 7785  | 88  |
| H(516) | 3761  | 9231  | 8764  | 60  |
| H(522) | 3718  | 8256  | 11129 | 70  |
| H(523) | 3045  | 8300  | 11942 | 92  |
| H(524) | 1969  | 8836  | 11947 | 102 |
| H(525) | 1644  | 9406  | 11059 | 90  |
| H(526) | 2268  | 9367  | 10187 | 66  |
| H(532) | 4723  | 9147  | 10724 | 70  |
| H(533) | 5326  | 10006 | 10967 | 88  |
| H(534) | 5069  | 10887 | 10390 | 98  |
| H(535) | 4158  | 10863 | 9616  | 88  |
| H(536) | 3501  | 9992  | 9434  | 70  |
| H(542) | 4979  | 8711  | 9590  | 69  |
| H(543) | 5733  | 7916  | 9512  | 97  |
| H(544) | 5382  | 6945  | 9732  | 93  |
| H(545) | 4206  | 6811  | 10049 | 88  |
| H(546) | 3466  | 7623  | 10177 | 62  |
| H(612) | 6741  | 9920  | 5625  | 91  |
| H(613) | 6150  | 10837 | 5509  | 122 |
| H(614) | 5110  | 10928 | 4881  | 113 |
| H(615) | 4656  | 10099 | 4335  | 110 |

|        |       |      |       |     |
|--------|-------|------|-------|-----|
| H(616) | 5219  | 9196 | 4465  | 79  |
| H(622) | 7727  | 9239 | 4729  | 80  |
| H(623) | 8240  | 9312 | 3792  | 108 |
| H(624) | 7712  | 8806 | 2934  | 137 |
| H(625) | 6628  | 8296 | 3025  | 113 |
| H(626) | 6106  | 8296 | 3909  | 73  |
| H(632) | 6498  | 9169 | 6300  | 78  |
| H(633) | 7317  | 8977 | 7197  | 116 |
| H(634) | 8259  | 8304 | 7084  | 136 |
| H(635) | 8502  | 7967 | 6127  | 111 |
| H(636) | 7712  | 8183 | 5281  | 75  |
| H(642) | 6372  | 7583 | 4754  | 71  |
| H(643) | 5571  | 6826 | 4904  | 91  |
| H(644) | 4565  | 6992 | 5431  | 96  |
| H(645) | 4403  | 7938 | 5856  | 91  |
| H(646) | 5171  | 8712 | 5649  | 74  |
| H(712) | 7305  | 7170 | 277   | 72  |
| H(713) | 6634  | 7062 | 1130  | 92  |
| H(714) | 7125  | 7414 | 2072  | 101 |
| H(715) | 8105  | 7972 | 2130  | 92  |
| H(716) | 8738  | 8097 | 1257  | 85  |
| H(722) | 8645  | 8847 | 500   | 92  |
| H(723) | 9470  | 9620 | 418   | 114 |
| H(724) | 10518 | 9453 | -35   | 115 |
| H(725) | 10712 | 8559 | -525  | 97  |
| H(726) | 9898  | 7783 | -419  | 86  |
| H(732) | 7337  | 8304 | -205  | 121 |
| H(733) | 6639  | 8593 | -1105 | 133 |
| H(734) | 6893  | 8081 | -1994 | 144 |
| H(735) | 7935  | 7588 | -2108 | 126 |
| H(736) | 8604  | 7333 | -1175 | 110 |
| H(742) | 8272  | 6542 | -511  | 82  |
| H(743) | 8821  | 5643 | -412  | 102 |
| H(744) | 9891  | 5514 | 215   | 101 |
| H(745) | 10389 | 6331 | 745   | 81  |
| H(746) | 9807  | 7250 | 657   | 67  |
| H(812) | 8368  | 1327 | 4477  | 68  |
| H(813) | 9031  | 460  | 4574  | 97  |
| H(814) | 10056 | 417  | 5275  | 96  |
| H(815) | 10469 | 1270 | 5745  | 84  |
| H(816) | 9825  | 2141 | 5635  | 65  |
| H(822) | 7278  | 3051 | 4607  | 84  |
| H(823) | 6693  | 3256 | 3645  | 99  |
| H(824) | 7059  | 2833 | 2788  | 105 |
| H(825) | 8108  | 2253 | 2815  | 102 |
| H(826) | 8745  | 2087 | 3772  | 94  |
| H(832) | 9912  | 2713 | 4563  | 84  |
| H(833) | 10667 | 3530 | 4561  | 108 |
| H(834) | 10351 | 4387 | 5054  | 111 |
| H(835) | 9268  | 4459 | 5446  | 104 |
| H(836) | 8506  | 3639 | 5486  | 77  |
| H(842) | 7302  | 1927 | 5125  | 73  |
| H(843) | 6592  | 1761 | 5923  | 91  |
| H(844) | 6937  | 2182 | 6906  | 89  |
| H(845) | 7929  | 2799 | 7019  | 82  |
| H(846) | 8647  | 2897 | 6197  | 68  |

**Table S4.** Anisotropic parameters ( $\text{\AA}^2 \times 10^3$ ) for **1**.

The anisotropic displacement factor exponent takes the form:

$$-2 \pi^2 [ h^2 a^{*2} U_{11} + \dots + 2 h k a^* b^* U_{12} ]$$

|         | U11      | U22      | U33      | U23      | U13     | U12     |
|---------|----------|----------|----------|----------|---------|---------|
| Ru (1)  | 47 (1)   | 22 (1)   | 39 (1)   | 1 (1)    | -9 (1)  | -4 (1)  |
| N (11)  | 62 (4)   | 29 (3)   | 41 (3)   | 5 (2)    | -9 (3)  | -12 (3) |
| C (12)  | 52 (5)   | 43 (4)   | 58 (5)   | 2 (3)    | 6 (4)   | -9 (3)  |
| C (13)  | 72 (5)   | 47 (4)   | 81 (6)   | 11 (4)   | 16 (4)  | -18 (4) |
| C (14)  | 75 (6)   | 60 (5)   | 81 (6)   | -11 (4)  | 34 (5)  | -6 (4)  |
| C (15)  | 62 (5)   | 41 (4)   | 57 (5)   | -5 (3)   | 14 (4)  | -6 (3)  |
| C (16)  | 54 (4)   | 30 (3)   | 45 (4)   | 1 (3)    | -9 (4)  | -6 (3)  |
| C (17)  | 52 (4)   | 24 (3)   | 34 (4)   | 4 (3)    | 1 (3)   | -13 (3) |
| N (18)  | 54 (4)   | 11 (2)   | 42 (4)   | -1 (2)   | 8 (3)   | 1 (2)   |
| C (19)  | 45 (4)   | 30 (4)   | 35 (4)   | 5 (3)    | 1 (3)   | 0 (3)   |
| C (110) | 41 (4)   | 30 (4)   | 54 (4)   | 7 (3)    | 1 (4)   | -7 (3)  |
| C (111) | 58 (5)   | 21 (3)   | 67 (5)   | 6 (3)    | 5 (4)   | -2 (3)  |
| C (112) | 52 (4)   | 27 (3)   | 52 (4)   | 0 (3)    | 0 (4)   | 2 (3)   |
| C (113) | 47 (4)   | 38 (4)   | 40 (4)   | 9 (3)    | -4 (3)  | -2 (3)  |
| N (114) | 55 (4)   | 38 (3)   | 50 (4)   | -7 (3)   | -12 (3) | 5 (3)   |
| C (115) | 56 (4)   | 50 (4)   | 72 (6)   | -2 (4)   | -10 (4) | 5 (3)   |
| C (116) | 68 (5)   | 62 (5)   | 83 (6)   | 1 (5)    | 9 (4)   | 9 (4)   |
| C (117) | 60 (5)   | 66 (5)   | 85 (6)   | 18 (4)   | 17 (4)  | -5 (4)  |
| C (118) | 46 (4)   | 49 (4)   | 54 (4)   | 9 (3)    | 0 (4)   | -5 (3)  |
| C (119) | 72 (5)   | 37 (3)   | 81 (5)   | 6 (4)    | 22 (4)  | -2 (3)  |
| C (120) | 79 (5)   | 44 (4)   | 82 (6)   | 6 (4)    | 23 (5)  | 1 (4)   |
| C (121) | 84 (5)   | 53 (4)   | 108 (7)  | 9 (5)    | 14 (5)  | -5 (4)  |
| C (122) | 97 (6)   | 42 (4)   | 100 (7)  | -6 (5)   | 30 (6)  | 8 (4)   |
| C (123) | 105 (6)  | 55 (5)   | 95 (6)   | 2 (5)    | 22 (5)  | -12 (5) |
| C (124) | 78 (5)   | 40 (4)   | 82 (6)   | 8 (4)    | 30 (4)  | 1 (3)   |
| C (125) | 92 (7)   | 59 (5)   | 105 (7)  | -25 (5)  | 20 (6)  | 4 (5)   |
| N (126) | 107 (6)  | 40 (3)   | 106 (6)  | 23 (4)   | 6 (5)   | 8 (4)   |
| C (127) | 94 (6)   | 59 (5)   | 121 (8)  | 7 (5)    | -4 (6)  | -6 (5)  |
| C (128) | 79 (6)   | 52 (5)   | 146 (8)  | 17 (5)   | -2 (6)  | 1 (4)   |
| C (129) | 93 (6)   | 67 (5)   | 121 (8)  | 11 (5)   | -23 (6) | -1 (5)  |
| N (130) | 114 (6)  | 41 (4)   | 100 (6)  | 8 (4)    | 11 (5)  | 0 (4)   |
| C (131) | 122 (8)  | 77 (6)   | 113 (8)  | 5 (6)    | 5 (7)   | -13 (6) |
| C (132) | 148 (10) | 127 (9)  | 168 (11) | -28 (9)  | -16 (9) | -13 (8) |
| C (133) | 165 (11) | 212 (13) | 186 (12) | -35 (11) | -2 (10) | 29 (11) |
| N (21)  | 36 (3)   | 33 (3)   | 41 (3)   | 6 (2)    | -5 (3)  | -3 (2)  |
| C (22)  | 56 (5)   | 54 (5)   | 54 (5)   | 0 (4)    | -4 (4)  | -7 (3)  |
| C (23)  | 59 (5)   | 87 (6)   | 68 (5)   | 9 (5)    | -21 (4) | -20 (5) |
| C (24)  | 54 (5)   | 80 (6)   | 61 (5)   | 28 (5)   | -19 (4) | -8 (4)  |
| C (25)  | 66 (5)   | 39 (4)   | 63 (5)   | 14 (4)   | -6 (4)  | -3 (3)  |
| C (26)  | 50 (4)   | 31 (4)   | 44 (4)   | 5 (3)    | -2 (4)  | 1 (3)   |
| C (27)  | 49 (4)   | 36 (4)   | 50 (4)   | 0 (3)    | -12 (3) | -8 (3)  |
| N (28)  | 38 (4)   | 53 (4)   | 31 (3)   | 4 (3)    | -21 (3) | 3 (3)   |
| C (29)  | 49 (4)   | 43 (4)   | 66 (5)   | -10 (4)  | -7 (4)  | -14 (4) |

|        |         |         |         |         |         |        |
|--------|---------|---------|---------|---------|---------|--------|
| C(210) | 89(6)   | 38(4)   | 69(5)   | -14(4)  | -17(5)  | -12(4) |
| C(211) | 119(7)  | 22(4)   | 71(6)   | 3(3)    | -11(5)  | -16(4) |
| C(212) | 77(5)   | 30(4)   | 77(6)   | 8(4)    | -15(5)  | 6(4)   |
| C(213) | 47(4)   | 32(4)   | 46(4)   | -4(3)   | -9(4)   | -3(3)  |
| N(214) | 49(4)   | 38(4)   | 43(4)   | -3(3)   | 2(3)    | 1(3)   |
| C(215) | 58(5)   | 44(4)   | 51(5)   | 5(3)    | -12(4)  | 12(3)  |
| C(216) | 63(5)   | 54(5)   | 55(5)   | -6(4)   | -19(4)  | 13(4)  |
| C(217) | 64(5)   | 78(6)   | 69(6)   | -17(5)  | -29(5)  | 23(5)  |
| C(218) | 66(6)   | 64(5)   | 59(5)   | -16(4)  | -7(5)   | 3(4)   |
| Ru(3)  | 50(1)   | 28(1)   | 46(1)   | -3(1)   | -10(1)  | 5(1)   |
| N(31)  | 55(4)   | 30(3)   | 48(4)   | -3(3)   | -5(3)   | 4(3)   |
| C(32)  | 53(4)   | 33(4)   | 54(5)   | -3(3)   | -17(4)  | -9(3)  |
| C(33)  | 65(5)   | 60(5)   | 60(5)   | 2(4)    | -23(4)  | -24(4) |
| C(34)  | 49(4)   | 46(4)   | 70(5)   | 7(4)    | -21(4)  | -2(3)  |
| C(35)  | 50(4)   | 42(4)   | 61(5)   | 11(3)   | -15(4)  | -1(3)  |
| C(36)  | 45(4)   | 38(4)   | 46(4)   | 5(3)    | -6(4)   | -7(3)  |
| C(37)  | 47(4)   | 24(3)   | 36(4)   | 3(3)    | -8(3)   | 6(3)   |
| N(38)  | 61(4)   | 20(3)   | 62(4)   | -8(3)   | 8(4)    | -5(3)  |
| C(39)  | 48(4)   | 28(4)   | 37(4)   | -2(3)   | -1(3)   | 4(3)   |
| C(310) | 61(5)   | 41(4)   | 47(4)   | -1(3)   | -8(4)   | 8(3)   |
| C(311) | 53(4)   | 35(4)   | 59(5)   | 4(3)    | -9(4)   | -1(3)  |
| C(312) | 61(4)   | 33(4)   | 52(4)   | 0(3)    | -11(4)  | -1(3)  |
| C(313) | 50(4)   | 39(4)   | 45(4)   | -9(3)   | 7(4)    | 3(3)   |
| N(314) | 42(3)   | 38(3)   | 39(3)   | -3(3)   | -9(3)   | 5(2)   |
| C(315) | 60(5)   | 37(4)   | 55(5)   | -2(3)   | -7(4)   | 20(3)  |
| C(316) | 55(4)   | 44(4)   | 54(4)   | 1(4)    | -5(4)   | 15(4)  |
| C(317) | 71(6)   | 57(5)   | 62(5)   | -9(4)   | -22(5)  | 2(4)   |
| C(318) | 43(4)   | 48(4)   | 44(4)   | -7(3)   | -17(4)  | 2(3)   |
| C(319) | 62(4)   | 26(3)   | 57(4)   | -1(3)   | -8(3)   | -7(3)  |
| C(320) | 77(5)   | 42(4)   | 73(5)   | -3(3)   | -27(4)  | 1(3)   |
| C(321) | 86(6)   | 58(5)   | 68(5)   | -12(4)  | -25(5)  | 21(4)  |
| C(322) | 81(5)   | 39(4)   | 84(6)   | -12(4)  | -32(5)  | 11(3)  |
| C(323) | 105(7)  | 60(5)   | 95(7)   | 13(5)   | -27(6)  | -12(5) |
| C(324) | 72(5)   | 52(4)   | 65(5)   | 2(4)    | -19(4)  | -3(4)  |
| C(325) | 101(6)  | 45(4)   | 155(9)  | -23(5)  | -53(6)  | 8(4)   |
| N(326) | 114(6)  | 58(5)   | 228(10) | -15(6)  | -87(7)  | 19(4)  |
| C(327) | 128(9)  | 99(8)   | 198(12) | -45(8)  | -33(9)  | 44(7)  |
| C(328) | 196(12) | 133(10) | 199(13) | -62(10) | 1(11)   | 28(9)  |
| C(329) | 288(16) | 215(15) | 305(17) | -52(14) | -24(14) | 51(13) |
| N(330) | 119(6)  | 55(4)   | 170(8)  | -14(5)  | -68(6)  | 13(5)  |
| C(331) | 108(8)  | 82(7)   | 185(11) | -32(7)  | -38(8)  | 8(6)   |
| C(332) | 254(16) | 263(17) | 240(16) | -50(14) | 34(14)  | 37(14) |
| C(333) | 350(20) | 330(20) | 340(20) | -44(17) | 26(16)  | 14(16) |
| N(41)  | 63(4)   | 41(4)   | 56(4)   | 7(3)    | 18(3)   | 8(3)   |
| C(42)  | 112(8)  | 50(5)   | 81(6)   | 8(4)    | 34(6)   | 4(5)   |
| C(43)  | 155(10) | 90(8)   | 144(10) | 6(7)    | 71(8)   | -8(7)  |
| C(44)  | 136(9)  | 109(9)  | 137(10) | 12(8)   | 72(8)   | -21(7) |
| C(45)  | 84(6)   | 62(5)   | 89(7)   | 22(5)   | -3(6)   | -1(5)  |
| C(46)  | 61(5)   | 52(5)   | 60(5)   | 9(4)    | -4(4)   | -8(4)  |
| C(47)  | 53(5)   | 49(5)   | 66(6)   | 6(4)    | -21(5)  | 3(4)   |
| N(48)  | 38(4)   | 66(5)   | 47(4)   | -2(3)   | -25(4)  | 3(3)   |
| C(49)  | 45(4)   | 48(5)   | 70(6)   | -18(4)  | -18(4)  | 14(4)  |
| C(410) | 81(6)   | 45(5)   | 97(7)   | -12(5)  | 1(6)    | -8(4)  |
| C(411) | 106(9)  | 50(6)   | 118(10) | -10(6)  | -3(8)   | 13(5)  |
| C(412) | 90(7)   | 53(5)   | 88(7)   | 12(5)   | -9(6)   | 2(5)   |
| C(413) | 51(4)   | 47(4)   | 51(5)   | -18(3)  | -5(4)   | 15(3)  |
| N(414) | 46(4)   | 38(3)   | 58(4)   | -6(3)   | -16(3)  | 3(3)   |

|        |         |        |         |        |        |        |
|--------|---------|--------|---------|--------|--------|--------|
| C(415) | 66(6)   | 52(5)  | 70(6)   | -8(4)  | 2(5)   | 8(4)   |
| C(416) | 77(6)   | 96(7)  | 82(6)   | -10(6) | 12(5)  | -3(6)  |
| C(417) | 78(6)   | 95(7)  | 91(7)   | -21(6) | 20(5)  | 4(5)   |
| C(418) | 65(5)   | 72(5)  | 88(7)   | -31(5) | -1(5)  | 10(4)  |
| B(5)   | 47(4)   | 24(3)  | 49(5)   | -4(3)  | 4(4)   | 1(3)   |
| C(511) | 46(4)   | 39(4)  | 45(4)   | -6(3)  | 0(3)   | 4(3)   |
| C(512) | 53(4)   | 40(4)  | 59(5)   | -16(3) | -6(4)  | 3(3)   |
| C(513) | 45(4)   | 54(5)  | 84(6)   | -24(4) | 0(4)   | 7(3)   |
| C(514) | 73(6)   | 74(6)  | 58(5)   | -31(4) | -8(5)  | 24(4)  |
| C(515) | 102(7)  | 67(5)  | 52(5)   | 0(4)   | 17(5)  | 32(5)  |
| C(516) | 57(4)   | 50(4)  | 43(4)   | 1(3)   | -2(4)  | 9(3)   |
| C(521) | 46(4)   | 48(4)  | 46(4)   | -14(3) | -4(4)  | -8(3)  |
| C(522) | 54(5)   | 62(5)  | 58(5)   | -15(4) | 2(4)   | -4(4)  |
| C(523) | 75(6)   | 88(7)  | 66(6)   | 5(5)   | 1(5)   | -11(5) |
| C(524) | 79(6)   | 110(8) | 67(6)   | -14(6) | 5(6)   | -24(6) |
| C(525) | 80(7)   | 75(6)  | 69(6)   | -14(5) | 6(5)   | -5(5)  |
| C(526) | 54(5)   | 56(4)  | 56(5)   | -13(4) | -2(4)  | -3(4)  |
| C(531) | 53(5)   | 30(3)  | 65(5)   | -12(3) | 3(4)   | 7(3)   |
| C(532) | 57(5)   | 42(4)  | 74(6)   | -8(4)  | -6(5)  | 0(4)   |
| C(533) | 61(5)   | 64(5)  | 94(7)   | -6(5)  | -5(5)  | -2(5)  |
| C(534) | 78(6)   | 63(6)  | 103(8)  | -19(5) | 1(6)   | -21(5) |
| C(535) | 98(7)   | 35(4)  | 86(6)   | 4(4)   | -8(6)  | -12(4) |
| C(536) | 56(4)   | 46(4)  | 71(5)   | -3(4)  | 4(4)   | 1(4)   |
| C(541) | 58(5)   | 38(4)  | 53(4)   | -7(3)  | -7(4)  | 4(3)   |
| C(542) | 55(5)   | 36(4)  | 83(6)   | 6(4)   | 17(4)  | 7(3)   |
| C(543) | 60(6)   | 67(6)  | 115(8)  | -5(5)  | 10(6)  | 23(5)  |
| C(544) | 91(7)   | 40(4)  | 102(7)  | -1(4)  | 4(6)   | 22(4)  |
| C(545) | 88(6)   | 40(4)  | 89(6)   | 4(4)   | -11(5) | 2(4)   |
| C(546) | 57(4)   | 37(3)  | 61(5)   | -3(3)  | 1(4)   | -8(3)  |
| B(6)   | 43(4)   | 31(4)  | 44(5)   | -3(3)  | 5(4)   | -2(3)  |
| C(611) | 53(4)   | 43(4)  | 60(5)   | 7(4)   | 5(4)   | -4(3)  |
| C(612) | 75(5)   | 47(5)  | 106(7)  | 1(5)   | 11(5)  | -3(4)  |
| C(613) | 111(8)  | 53(5)  | 140(10) | -20(6) | 15(7)  | -7(5)  |
| C(614) | 91(8)   | 53(6)  | 142(10) | 4(6)   | 23(7)  | 13(5)  |
| C(615) | 73(6)   | 81(7)  | 124(8)  | 36(7)  | 16(6)  | 17(6)  |
| C(616) | 67(6)   | 48(5)  | 81(6)   | 10(4)  | 2(5)   | -2(4)  |
| C(621) | 56(4)   | 40(4)  | 57(5)   | -1(3)  | 2(4)   | 5(3)   |
| C(622) | 80(6)   | 59(5)  | 61(6)   | 10(4)  | 15(5)  | 5(4)   |
| C(623) | 91(7)   | 86(7)  | 98(8)   | 15(6)  | 35(7)  | 5(5)   |
| C(624) | 168(11) | 113(9) | 66(7)   | 4(6)   | 32(8)  | -11(8) |
| C(625) | 123(8)  | 77(6)  | 81(7)   | -5(6)  | -6(7)  | 15(6)  |
| C(626) | 69(5)   | 54(5)  | 60(5)   | -2(4)  | 2(4)   | 10(4)  |
| C(631) | 49(4)   | 48(4)  | 51(4)   | 19(3)  | -5(4)  | -12(3) |
| C(632) | 82(6)   | 66(5)  | 46(5)   | 11(4)  | -2(4)  | -24(4) |
| C(633) | 141(10) | 93(7)  | 55(5)   | 5(5)   | 1(7)   | -52(7) |
| C(634) | 89(8)   | 128(9) | 117(10) | 63(8)  | -34(8) | -33(7) |
| C(635) | 59(5)   | 114(8) | 104(8)  | 51(7)  | -8(6)  | -14(5) |
| C(636) | 50(4)   | 68(5)  | 68(5)   | 25(4)  | -2(4)  | -4(4)  |
| C(641) | 59(5)   | 37(4)  | 52(4)   | -3(3)  | -10(4) | -5(3)  |
| C(642) | 66(5)   | 41(4)  | 72(5)   | -3(4)  | 6(4)   | -4(3)  |
| C(643) | 95(7)   | 41(4)  | 90(6)   | 5(4)   | -2(6)  | -22(4) |
| C(644) | 86(6)   | 61(5)  | 92(7)   | -4(5)  | 10(6)  | -26(5) |
| C(645) | 68(5)   | 76(6)  | 86(6)   | 5(5)   | 18(5)  | -17(4) |
| C(646) | 59(5)   | 54(4)  | 72(5)   | -1(4)  | 5(4)   | -14(4) |
| B(7)   | 58(5)   | 45(5)  | 63(6)   | 6(4)   | -14(5) | 3(4)   |
| C(711) | 65(5)   | 39(4)  | 52(5)   | 13(3)  | -2(4)  | 3(3)   |
| C(712) | 72(6)   | 53(5)  | 54(5)   | 9(4)   | 5(5)   | -4(4)  |

|        |        |         |        |        |        |        |
|--------|--------|---------|--------|--------|--------|--------|
| C(713) | 64(6)  | 74(6)   | 94(8)  | 18(6)  | 13(6)  | 0(5)   |
| C(714) | 93(7)  | 85(7)   | 77(7)  | 18(6)  | 31(6)  | 31(6)  |
| C(715) | 86(7)  | 83(7)   | 60(6)  | -7(5)  | 0(5)   | 23(5)  |
| C(716) | 68(6)  | 67(6)   | 76(6)  | -1(5)  | -3(5)  | 18(5)  |
| C(721) | 56(5)  | 44(4)   | 66(5)  | 17(4)  | -12(4) | -6(3)  |
| C(722) | 76(5)  | 54(5)   | 99(7)  | 25(5)  | -5(5)  | -10(4) |
| C(723) | 105(7) | 48(5)   | 132(9) | 6(5)   | 4(7)   | -3(5)  |
| C(724) | 90(7)  | 82(7)   | 114(8) | 24(6)  | 4(7)   | -19(6) |
| C(725) | 59(6)  | 69(6)   | 114(8) | 25(6)  | 3(6)   | -1(5)  |
| C(726) | 72(6)  | 52(5)   | 88(6)  | 16(4)  | -13(5) | -1(4)  |
| C(731) | 67(5)  | 73(6)   | 63(5)  | 29(5)  | -5(5)  | -23(4) |
| C(732) | 75(6)  | 106(8)  | 120(8) | 76(7)  | -6(6)  | -10(5) |
| C(733) | 81(7)  | 126(9)  | 121(9) | 70(8)  | -15(7) | -6(6)  |
| C(734) | 96(9)  | 157(11) | 103(9) | 66(9)  | -18(8) | -48(8) |
| C(735) | 105(8) | 136(9)  | 71(7)  | 36(6)  | -14(7) | -35(7) |
| C(736) | 89(7)  | 85(7)   | 98(8)  | 44(6)  | -11(6) | -38(5) |
| C(741) | 58(5)  | 44(4)   | 38(4)  | 4(3)   | -5(4)  | -6(3)  |
| C(742) | 78(6)  | 67(6)   | 59(5)  | 2(4)   | -3(5)  | -16(4) |
| C(743) | 105(7) | 65(6)   | 82(7)  | -7(5)  | -5(6)  | -17(5) |
| C(744) | 116(8) | 39(5)   | 102(8) | 3(5)   | 44(7)  | 7(5)   |
| C(745) | 71(5)  | 52(5)   | 79(6)  | 13(4)  | 10(4)  | 13(5)  |
| C(746) | 66(6)  | 44(4)   | 57(5)  | 1(4)   | 0(4)   | -2(4)  |
| B(8)   | 56(5)  | 38(4)   | 65(6)  | -2(4)  | -13(5) | -6(4)  |
| C(811) | 49(4)  | 39(4)   | 56(5)  | -6(3)  | 1(4)   | -3(3)  |
| C(812) | 58(4)  | 37(4)   | 74(5)  | -11(4) | -3(4)  | -2(4)  |
| C(813) | 95(7)  | 49(5)   | 99(7)  | -10(5) | 6(6)   | -13(5) |
| C(814) | 90(7)  | 46(5)   | 105(7) | 5(5)   | 9(6)   | 8(5)   |
| C(815) | 64(5)  | 53(5)   | 91(6)  | 12(5)  | -1(5)  | 6(4)   |
| C(816) | 50(5)  | 48(4)   | 63(5)  | -1(4)  | -7(4)  | 1(4)   |
| C(821) | 53(4)  | 44(4)   | 60(5)  | 16(4)  | -6(4)  | -12(3) |
| C(822) | 67(6)  | 61(5)   | 78(6)  | 19(4)  | -13(5) | -3(4)  |
| C(823) | 76(6)  | 76(6)   | 90(7)  | 43(6)  | -22(6) | -23(5) |
| C(824) | 107(8) | 89(7)   | 62(6)  | 23(6)  | -15(6) | -36(6) |
| C(825) | 91(7)  | 90(7)   | 76(7)  | 17(5)  | 10(6)  | -40(5) |
| C(826) | 92(7)  | 70(6)   | 72(6)  | 20(5)  | -2(5)  | -19(5) |
| C(831) | 51(4)  | 38(4)   | 73(6)  | 2(4)   | -3(4)  | 2(3)   |
| C(832) | 66(5)  | 48(5)   | 98(7)  | 11(5)  | 7(5)   | 4(4)   |
| C(833) | 68(6)  | 62(6)   | 138(9) | 13(6)  | 3(6)   | -10(5) |
| C(834) | 73(6)  | 64(6)   | 138(9) | 17(6)  | -15(6) | -20(5) |
| C(835) | 109(7) | 45(5)   | 100(7) | 10(5)  | -26(6) | -2(5)  |
| C(836) | 74(5)  | 49(4)   | 66(5)  | 11(4)  | -12(4) | -9(4)  |
| C(841) | 47(4)  | 49(4)   | 57(5)  | 10(3)  | -2(4)  | 7(3)   |
| C(842) | 63(5)  | 60(5)   | 62(5)  | 0(4)   | 13(4)  | -2(4)  |
| C(843) | 70(5)  | 77(6)   | 79(6)  | -1(5)  | 2(5)   | -11(4) |
| C(844) | 79(6)  | 62(5)   | 84(7)  | 19(5)  | 25(5)  | 20(4)  |
| C(845) | 87(6)  | 59(5)   | 57(5)  | 9(4)   | -5(5)  | 17(4)  |
| C(846) | 56(5)  | 49(4)   | 62(5)  | 4(4)   | -11(4) | -1(3)  |
| P(1)   | 83(2)  | 60(1)   | 154(3) | 27(2)  | -31(2) | -18(1) |
| F(11)  | 150(5) | 105(4)  | 128(5) | 9(4)   | -12(4) | 8(4)   |
| F(12)  | 115(4) | 82(3)   | 134(5) | 25(3)  | -2(4)  | -34(3) |
| F(13)  | 140(5) | 81(3)   | 171(6) | 25(4)  | -46(4) | -54(3) |
| F(14)  | 161(6) | 152(6)  | 217(7) | 89(5)  | -80(5) | -44(5) |
| F(15)  | 110(4) | 90(4)   | 208(7) | 29(4)  | -64(4) | -29(3) |
| F(16)  | 141(5) | 107(5)  | 249(8) | -25(5) | 32(5)  | 20(4)  |
| P(2)   | 129(3) | 80(2)   | 195(4) | -52(2) | 43(3)  | -24(2) |
| F(21)  | 181(6) | 135(6)  | 180(7) | -43(5) | -44(6) | -26(5) |
| F(22)  | 135(6) | 193(7)  | 261(9) | -28(7) | 23(6)  | -1(6)  |

|       |         |        |         |        |       |        |
|-------|---------|--------|---------|--------|-------|--------|
| F(23) | 186(7)  | 152(7) | 293(10) | 31(7)  | 11(7) | -68(6) |
| F(24) | 215(8)  | 155(7) | 301(10) | -61(7) | 75(8) | 35(6)  |
| F(25) | 251(9)  | 142(6) | 229(9)  | -42(6) | 92(7) | -68(6) |
| F(26) | 291(10) | 209(8) | 177(7)  | -87(7) | 2(7)  | -60(7) |

**Table S5.** Bond lengths [ $\text{\AA}$ ] and angles [ $^\circ$ ] for **1**.

|               |           |               |           |
|---------------|-----------|---------------|-----------|
| Ru(1)-N(28)   | 1.938(7)  | C(22)-C(23)   | 1.37(1)   |
| Ru(1)-N(18)   | 2.038(5)  | C(23)-C(24)   | 1.435(13) |
| Ru(1)-N(214)  | 2.063(6)  | C(24)-C(25)   | 1.389(10) |
| Ru(1)-N(114)  | 2.069(7)  | C(25)-C(26)   | 1.374(9)  |
| Ru(1)-N(21)   | 2.076(5)  | C(26)-C(27)   | 1.493(9)  |
| Ru(1)-N(11)   | 2.083(6)  | C(27)-C(212)  | 1.339(10) |
| N(11)-C(12)   | 1.313(8)  | C(27)-N(28)   | 1.373(8)  |
| N(11)-C(16)   | 1.392(8)  | N(28)-C(29)   | 1.384(8)  |
|               |           | C(29)-C(210)  | 1.335(11) |
|               |           | C(29)-C(213)  | 1.483(10) |
|               |           | C(210)-C(211) | 1.388(10) |
| C(12)-C(13)   | 1.371(10) | C(211)-C(212) | 1.406(10) |
| C(13)-C(14)   | 1.387(11) | C(213)-N(214) | 1.365(8)  |
| C(14)-C(15)   | 1.392(10) | C(213)-C(218) | 1.392(10) |
| C(15)-C(16)   | 1.364(10) | N(214)-C(215) | 1.346(8)  |
| C(16)-C(17)   | 1.467(9)  | C(215)-C(216) | 1.368(10) |
| C(17)-N(18)   | 1.307(8)  | C(216)-C(217) | 1.409(12) |
| C(17)-C(112)  | 1.417(8)  | C(217)-C(218) | 1.371(11) |
| N(18)-C(19)   | 1.288(8)  | Ru(3)-N(48)   | 1.930(8)  |
| C(19)-C(110)  | 1.426(9)  | Ru(3)-N(38)   | 2.035(6)  |
| C(19)-C(113)  | 1.456(9)  | Ru(3)-N(31)   | 2.055(6)  |
| C(110)-C(111) | 1.377(9)  | Ru(3)-N(414)  | 2.070(7)  |
| C(111)-C(112) | 1.387(9)  | Ru(3)-N(314)  | 2.090(5)  |
| C(111)-C(119) | 1.475(10) | Ru(3)-N(41)   | 2.100(6)  |
| C(113)-C(118) | 1.372(9)  | N(31)-C(32)   | 1.332(7)  |
| C(113)-N(114) | 1.394(8)  | N(31)-C(36)   | 1.350(8)  |
| N(114)-C(115) | 1.305(9)  | C(32)-C(33)   | 1.365(9)  |
| C(115)-C(116) | 1.421(11) | C(33)-C(34)   | 1.356(11) |
| C(116)-C(117) | 1.401(11) | C(34)-C(35)   | 1.383(10) |
| C(117)-C(118) | 1.405(10) | C(35)-C(36)   | 1.412(9)  |
| C(119)-C(124) | 1.381(9)  | C(36)-C(37)   | 1.424(9)  |
| C(119)-C(120) | 1.418(10) | C(37)-N(38)   | 1.320(8)  |
| C(120)-C(121) | 1.365(9)  | C(37)-C(312)  | 1.426(9)  |
| C(121)-C(122) | 1.411(11) | N(38)-C(39)   | 1.311(8)  |
| C(122)-C(123) | 1.383(10) | C(39)-C(310)  | 1.431(9)  |
| C(122)-C(125) | 1.548(11) | C(39)-C(313)  | 1.448(9)  |
| C(123)-C(124) | 1.364(9)  | C(310)-C(311) | 1.408(9)  |
| C(125)-N(126) | 1.313(8)  | C(311)-C(312) | 1.405(9)  |
| C(125)-N(130) | 1.318(8)  | C(311)-C(319) | 1.483(10) |
| N(126)-C(127) | 1.449(7)  | C(313)-N(314) | 1.370(8)  |
| C(127)-C(128) | 1.446(8)  | C(313)-C(318) | 1.390(9)  |
| C(128)-C(129) | 1.536(7)  | N(314)-C(315) | 1.336(8)  |
| N(130)-C(131) | 1.439(7)  | C(315)-C(316) | 1.409(9)  |
| C(131)-C(132) | 1.459(9)  | C(316)-C(317) | 1.316(11) |
| C(132)-C(133) | 1.585(9)  | C(317)-C(318) | 1.36(1)   |
| N(21)-C(22)   | 1.344(8)  | C(319)-C(324) | 1.374(9)  |
| N(21)-C(26)   | 1.366(8)  | C(319)-C(320) | 1.398(9)  |

|                  |            |                  |            |
|------------------|------------|------------------|------------|
| C (320) -C (321) | 1.384 (9)  | C (542) -C (543) | 1.383 (11) |
| C (321) -C (322) | 1.381 (10) | C (543) -C (544) | 1.389 (12) |
| C (322) -C (323) | 1.375 (11) | C (544) -C (545) | 1.410 (12) |
| C (322) -C (325) | 1.501 (10) | C (545) -C (546) | 1.40 (1)   |
| C (323) -C (324) | 1.402 (10) | B (6) -C (621)   | 1.615 (11) |
| C (325) -N (326) | 1.314 (8)  | B (6) -C (611)   | 1.64 (1)   |
| C (325) -N (330) | 1.327 (9)  | B (6) -C (641)   | 1.65 (1)   |
| N (326) -C (327) | 1.445 (8)  | B (6) -C (631)   | 1.69 (1)   |
| C (327) -C (328) | 1.474 (9)  | C (611) -C (612) | 1.376 (11) |
| C (328) -C (329) | 1.586 (10) | C (611) -C (616) | 1.406 (11) |
| N (330) -C (331) | 1.446 (7)  | C (612) -C (613) | 1.420 (13) |
| C (331) -C (332) | 1.432 (9)  | C (613) -C (614) | 1.355 (14) |
| C (332) -C (333) | 1.546 (10) | C (614) -C (615) | 1.381 (14) |
| N (41) -C (42)   | 1.314 (10) | C (615) -C (616) | 1.375 (12) |
| N (41) -C (46)   | 1.341 (9)  | C (621) -C (622) | 1.389 (10) |
| C (42) -C (43)   | 1.318 (12) | C (621) -C (626) | 1.428 (10) |
| C (43) -C (44)   | 1.435 (15) | C (622) -C (623) | 1.394 (12) |
| C (44) -C (45)   | 1.358 (13) | C (623) -C (624) | 1.373 (14) |
| C (45) -C (46)   | 1.366 (11) | C (624) -C (625) | 1.406 (14) |
| C (46) -C (47)   | 1.445 (11) | C (625) -C (626) | 1.307 (12) |
| C (47) -C (412)  | 1.341 (12) | C (631) -C (636) | 1.357 (10) |
| C (47) -N (48)   | 1.413 (10) | C (631) -C (632) | 1.36 (1)   |
| N (48) -C (49)   | 1.374 (9)  | C (632) -C (633) | 1.461 (12) |
| C (49) -C (410)  | 1.338 (11) | C (633) -C (634) | 1.400 (15) |
| C (49) -C (413)  | 1.479 (11) | C (634) -C (635) | 1.345 (15) |
| C (410) -C (411) | 1.325 (13) | C (635) -C (636) | 1.391 (11) |
| C (411) -C (412) | 1.409 (13) | C (641) -C (646) | 1.381 (10) |
| C (413) -C (418) | 1.346 (11) | C (641) -C (642) | 1.397 (9)  |
| C (413) -N (414) | 1.362 (9)  | C (642) -C (643) | 1.394 (10) |
| N (414) -C (415) | 1.321 (10) | C (643) -C (644) | 1.355 (12) |
| C (415) -C (416) | 1.362 (11) | C (644) -C (645) | 1.392 (12) |
| C (416) -C (417) | 1.417 (13) | C (645) -C (646) | 1.402 (10) |
| C (417) -C (418) | 1.383 (12) | B (7) -C (711)   | 1.606 (12) |
| B (5) -C (521)   | 1.629 (11) | B (7) -C (731)   | 1.633 (11) |
| B (5) -C (541)   | 1.656 (10) | B (7) -C (721)   | 1.635 (11) |
| B (5) -C (531)   | 1.667 (10) | B (7) -C (741)   | 1.683 (11) |
| B (5) -C (511)   | 1.667 (10) | C (711) -C (716) | 1.328 (11) |
| C (511) -C (516) | 1.359 (9)  | C (711) -C (712) | 1.375 (10) |
| C (511) -C (512) | 1.406 (9)  | C (712) -C (713) | 1.392 (11) |
| C (512) -C (513) | 1.383 (10) | C (713) -C (714) | 1.360 (13) |
| C (513) -C (514) | 1.426 (11) | C (714) -C (715) | 1.280 (12) |
| C (514) -C (515) | 1.355 (11) | C (715) -C (716) | 1.410 (12) |
| C (515) -C (516) | 1.454 (10) | C (721) -C (726) | 1.391 (12) |
| C (521) -C (526) | 1.417 (10) | C (721) -C (722) | 1.400 (11) |
| C (521) -C (522) | 1.471 (10) | C (722) -C (723) | 1.415 (11) |
| C (522) -C (523) | 1.338 (11) | C (723) -C (724) | 1.354 (14) |
| C (523) -C (524) | 1.408 (12) | C (724) -C (725) | 1.363 (14) |
| C (524) -C (525) | 1.398 (12) | C (725) -C (726) | 1.416 (12) |
| C (525) -C (526) | 1.385 (11) | C (731) -C (736) | 1.365 (13) |
| C (531) -C (532) | 1.37 (1)   | C (731) -C (732) | 1.397 (12) |
| C (531) -C (536) | 1.378 (10) | C (732) -C (733) | 1.401 (12) |
| C (532) -C (533) | 1.363 (11) | C (733) -C (734) | 1.382 (16) |
| C (533) -C (534) | 1.420 (13) | C (734) -C (735) | 1.338 (16) |
| C (534) -C (535) | 1.339 (12) | C (735) -C (736) | 1.418 (12) |
| C (535) -C (536) | 1.411 (11) | C (741) -C (746) | 1.384 (10) |
| C (541) -C (542) | 1.395 (10) | C (741) -C (742) | 1.411 (10) |
| C (541) -C (546) | 1.401 (9)  | C (742) -C (743) | 1.353 (12) |



|                      |            |                           |           |
|----------------------|------------|---------------------------|-----------|
| C (743) -C (744)     | 1.412 (13) | N (21) -RU1-N (11)        | 96.1 (2)  |
| C (744) -C (745)     | 1.363 (13) | C (12) -N (11) -C (16)    | 119.0 (7) |
| C (745) -C (746)     | 1.414 (11) | C (12) -N (11) -RU1       | 128.1 (5) |
| B (8) -C (821)       | 1.595 (11) | C (16) -N (11) -RU1       | 112.8 (5) |
| B (8) -C (841)       | 1.632 (12) | N (11) -C (12) -C (13)    | 122.4 (7) |
| B (8) -C (811)       | 1.641 (11) | C (12) -C (13) -C (14)    | 120.0 (8) |
| B (8) -C (831)       | 1.674 (11) | C (13) -C (14) -C (15)    | 118.0 (8) |
| C (811) -C (816)     | 1.393 (10) | C (16) -C (15) -C (14)    | 119.8 (7) |
| C (811) -C (812)     | 1.396 (10) | C (15) -C (16) -N (11)    | 120.7 (7) |
| C (812) -C (813)     | 1.384 (11) | C (15) -C (16) -C (17)    | 125.4 (6) |
| C (813) -C (814)     | 1.404 (13) | N (11) -C (16) -C (17)    | 113.9 (7) |
| C (814) -C (815)     | 1.335 (13) | N (18) -C (17) -C (112)   | 117.5 (6) |
| C (815) -C (816)     | 1.386 (11) | N (18) -C (17) -C (16)    | 117.9 (6) |
| C (821) -C (822)     | 1.414 (10) | C (112) -C (17) -C (16)   | 124.6 (7) |
| C (821) -C (826)     | 1.430 (12) | C (19) -N (18) -C (17)    | 127.3 (6) |
| C (822) -C (823)     | 1.407 (11) | C (19) -N (18) -RU1       | 117.3 (5) |
| C (823) -C (824)     | 1.312 (13) | C (17) -N (18) -RU1       | 115.4 (4) |
| C (824) -C (825)     | 1.408 (13) | N (18) -C (19) -C (110)   | 116.9 (7) |
| C (825) -C (826)     | 1.408 (12) | N (18) -C (19) -C (113)   | 116.4 (6) |
| C (831) -C (832)     | 1.376 (11) | C (110) -C (19) -C (113)  | 126.7 (7) |
| C (831) -C (836)     | 1.418 (10) | C (111) -C (110) -C (19)  | 120.8 (7) |
| C (832) -C (833)     | 1.399 (11) | C (110) -C (111) -C (112) | 117.7 (7) |
| C (833) -C (834)     | 1.348 (14) | C (110) -C (111) -C (119) | 121.7 (7) |
| C (834) -C (835)     | 1.338 (14) | C (112) -C (111) -C (119) | 120.6 (7) |
| C (835) -C (836)     | 1.407 (11) | C (111) -C (112) -C (17)  | 119.9 (7) |
| C (841) -C (842)     | 1.363 (10) | C (118) -C (113) -N (114) | 120.9 (7) |
| C (841) -C (846)     | 1.402 (10) | C (118) -C (113) -C (19)  | 124.9 (7) |
| C (842) -C (843)     | 1.373 (11) | N (114) -C (113) -C (19)  | 114.0 (7) |
| C (843) -C (844)     | 1.417 (12) | C (115) -N (114) -C (113) | 118.5 (7) |
| C (844) -C (845)     | 1.361 (12) | C (115) -N (114) -RU1     | 127.5 (6) |
| C (845) -C (846)     | 1.397 (11) | C (113) -N (114) -RU1     | 113.3 (5) |
| P (1) -F (16)        | 1.539 (7)  | N (114) -C (115) -C (116) | 123.7 (8) |
| P (1) -F (14)        | 1.582 (7)  | C (117) -C (116) -C (115) | 118.4 (8) |
| P (1) -F (12)        | 1.583 (6)  | C (116) -C (117) -C (118) | 117.3 (8) |
| P (1) -F (15)        | 1.587 (5)  | C (113) -C (118) -C (117) | 121.1 (7) |
| P (1) -F (13)        | 1.596 (5)  | C (124) -C (119) -C (120) | 116.8 (7) |
| P (1) -F (11)        | 1.622 (7)  | C (124) -C (119) -C (111) | 122.6 (7) |
| P (2) -F (24)        | 1.561 (9)  | C (120) -C (119) -C (111) | 120.4 (7) |
| P (2) -F (25)        | 1.569 (8)  | C (121) -C (120) -C (119) | 122.9 (8) |
| P (2) -F (21)        | 1.578 (7)  | C (120) -C (121) -C (122) | 117.2 (8) |
| P (2) -F (23)        | 1.594 (8)  | C (123) -C (122) -C (121) | 121.2 (8) |
| P (2) -F (22)        | 1.594 (8)  | C (123) -C (122) -C (125) | 119.0 (8) |
| P (2) -F (26)        | 1.625 (8)  | C (121) -C (122) -C (125) | 119.7 (8) |
| N (28) -RU1-N (18)   | 177.0 (2)  | C (124) -C (123) -C (122) | 119.4 (8) |
| N (28) -RU1-N (214)  | 79.1 (2)   | C (123) -C (124) -C (119) | 122.3 (8) |
| N (18) -RU1-N (214)  | 98.8 (2)   | N (126) -C (125) -N (130) | 123.4 (8) |
| N (28) -RU1-N (114)  | 103.7 (2)  | N (126) -C (125) -C (122) | 115.9 (7) |
| N (18) -RU1-N (114)  | 78.6 (2)   | N (130) -C (125) -C (122) | 120.7 (8) |
| N (214) -RU1-N (114) | 96.0 (2)   | C (125) -N (126) -C (127) | 124.7 (7) |
| N (28) -RU1-N (21)   | 78.4 (2)   | C (128) -C (127) -N (126) | 112.8 (7) |
| N (18) -RU1-N (21)   | 103.6 (2)  | C (127) -C (128) -C (129) | 115.0 (7) |
| N (214) -RU1-N (21)  | 157.5 (2)  | C (125) -N (130) -C (131) | 128.3 (8) |
| N (114) -RU1-N (21)  | 87.8 (2)   | N (130) -C (131) -C (132) | 113.3 (7) |
| N (28) -RU1-N (11)   | 97.8 (2)   | C (131) -C (132) -C (133) | 108.6 (8) |
| N (18) -RU1-N (11)   | 79.9 (2)   | C (22) -N (21) -C (26)    | 118.4 (6) |
| N (214) -RU1-N (11)  | 88.6 (2)   | C (22) -N (21) -RU1       | 126.9 (5) |
| N (114) -RU1-N (11)  | 158.5 (2)  | C (26) -N (21) -RU1       | 114.3 (4) |

|                      |          |                      |            |
|----------------------|----------|----------------------|------------|
| N(21)-C(22)-C(23)    | 123.6(8) | C(39)-N(38)-C(37)    | 129.4(7)   |
| C(22)-C(23)-C(24)    | 118.2(8) | C(39)-N(38)-RU3      | 115.6(5)   |
| C(25)-C(24)-C(23)    | 117.7(7) | C(37)-N(38)-RU3      | 114.9(4)   |
| C(26)-C(25)-C(24)    | 120.4(7) | N(38)-C(39)-C(310)   | 117.1(6)   |
| N(21)-C(26)-C(25)    | 121.7(7) | N(38)-C(39)-C(313)   | 117.8(7)   |
| N(21)-C(26)-C(27)    | 115.3(6) | C(310)-C(39)-C(313)  | 125.0(7)   |
| C(25)-C(26)-C(27)    | 123.0(7) | C(311)-C(310)-C(39)  | 118.2(7)   |
| C(212)-C(27)-N(28)   | 122.8(7) | C(312)-C(311)-C(310) | 119.7(8)   |
| C(212)-C(27)-C(26)   | 127.6(7) | C(312)-C(311)-C(319) | 120.5(6)   |
| N(28)-C(27)-C(26)    | 109.5(7) | C(310)-C(311)-C(319) | 119.7(7)   |
| C(27)-N(28)-C(29)    | 116.7(7) | C(311)-C(312)-C(37)  | 119.8(7)   |
| C(27)-N(28)-RU1      | 122.2(5) | N(314)-C(313)-C(318) | 120.7(7)   |
| C(29)-N(28)-RU1      | 121.1(5) | N(314)-C(313)-C(39)  | 114.1(6)   |
| C(210)-C(29)-N(28)   | 122.1(8) | C(318)-C(313)-C(39)  | 125.1(7)   |
| C(210)-C(29)-C(213)  | 128.2(7) | C(315)-N(314)-C(313) | 118.3(6)   |
| N(28)-C(29)-C(213)   | 109.7(7) | C(315)-N(314)-RU3    | 128.1(5)   |
| C(29)-C(210)-C(211)  | 121.2(7) | C(313)-N(314)-RU3    | 113.5(5)   |
| C(210)-C(211)-C(212) | 117.1(7) | N(314)-C(315)-C(316) | 121.0(7)   |
| C(27)-C(212)-C(211)  | 120.1(7) | C(317)-C(316)-C(315) | 119.8(7)   |
| N(214)-C(213)-C(218) | 120.4(7) | C(316)-C(317)-C(318) | 120.9(8)   |
| N(214)-C(213)-C(29)  | 116.1(6) | C(317)-C(318)-C(313) | 119.1(7)   |
| C(218)-C(213)-C(29)  | 123.5(7) | C(324)-C(319)-C(320) | 120.6(6)   |
| C(215)-N(214)-C(213) | 118.9(6) | C(324)-C(319)-C(311) | 122.0(7)   |
| C(215)-N(214)-RU1    | 127.2(5) | C(320)-C(319)-C(311) | 117.4(6)   |
| C(213)-N(214)-RU1    | 113.7(5) | C(321)-C(320)-C(319) | 120.3(7)   |
| N(214)-C(215)-C(216) | 122.8(7) | C(322)-C(321)-C(320) | 119.1(8)   |
| C(215)-C(216)-C(217) | 118.9(8) | C(323)-C(322)-C(321) | 120.6(7)   |
| C(218)-C(217)-C(216) | 118.3(8) | C(323)-C(322)-C(325) | 120.6(8)   |
| C(217)-C(218)-C(213) | 120.6(8) | C(321)-C(322)-C(325) | 118.7(8)   |
| N(48)-RU3-N(38)      | 178.2(2) | C(322)-C(323)-C(324) | 120.8(8)   |
| N(48)-RU3-N(31)      | 99.6(2)  | C(319)-C(324)-C(323) | 118.4(7)   |
| N(38)-RU3-N(31)      | 79.1(2)  | N(326)-C(325)-N(330) | 121.7(8)   |
| N(48)-RU3-N(414)     | 78.7(3)  | N(326)-C(325)-C(322) | 116.7(7)   |
| N(38)-RU3-N(414)     | 102.6(2) | N(330)-C(325)-C(322) | 121.1(8)   |
| N(31)-RU3-N(414)     | 91.8(2)  | C(325)-N(326)-C(327) | 125.5(8)   |
| N(48)-RU3-N(314)     | 102.3(2) | N(326)-C(327)-C(328) | 108.3(9)   |
| N(38)-RU3-N(314)     | 78.9(2)  | C(327)-C(328)-C(329) | 105.1(9)   |
| N(31)-RU3-N(314)     | 158.0(3) | C(325)-N(330)-C(331) | 126.3(8)   |
| N(414)-RU3-N(314)    | 92.2(2)  | C(332)-C(331)-N(330) | 117.4(9)   |
| N(48)-RU3-N(41)      | 79.1(3)  | C(331)-C(332)-C(333) | 117.40(11) |
| N(38)-RU3-N(41)      | 99.6(2)  | C(42)-N(41)-C(46)    | 121.4(8)   |
| N(31)-RU3-N(41)      | 91.9(2)  | C(42)-N(41)-RU3      | 125.7(6)   |
| N(414)-RU3-N(41)     | 157.9(3) | C(46)-N(41)-RU3      | 112.7(6)   |
| N(314)-RU3-N(41)     | 92.5(2)  | N(41)-C(42)-C(43)    | 122.4(9)   |
| C(32)-N(31)-C(36)    | 118.5(6) | C(42)-C(43)-C(44)    | 119.00(11) |
| C(32)-N(31)-RU3      | 128.0(5) | C(45)-C(44)-C(43)    | 116.9(1)   |
| C(36)-N(31)-RU3      | 113.5(5) | C(44)-C(45)-C(46)    | 121.3(9)   |
| N(31)-C(32)-C(33)    | 122.2(7) | N(41)-C(46)-C(45)    | 118.9(9)   |
| C(34)-C(33)-C(32)    | 120.7(7) | N(41)-C(46)-C(47)    | 117.9(8)   |
| C(33)-C(34)-C(35)    | 118.9(7) | C(45)-C(46)-C(47)    | 123.2(8)   |
| C(34)-C(35)-C(36)    | 118.2(7) | C(412)-C(47)-N(48)   | 119.5(1)   |
| N(31)-C(36)-C(35)    | 121.3(7) | C(412)-C(47)-C(46)   | 130.1(1)   |
| N(31)-C(36)-C(37)    | 115.8(6) | N(48)-C(47)-C(46)    | 110.4(8)   |
| C(35)-C(36)-C(37)    | 122.7(7) | C(49)-N(48)-C(47)    | 118.2(9)   |
| N(38)-C(37)-C(36)    | 116.6(6) | C(49)-N(48)-RU3      | 121.9(6)   |
| N(38)-C(37)-C(312)   | 115.6(6) | C(47)-N(48)-RU3      | 119.9(6)   |
| C(36)-C(37)-C(312)   | 127.8(6) | C(410)-C(49)-N(48)   | 122.6(1)   |

|                           |             |                           |             |
|---------------------------|-------------|---------------------------|-------------|
| C (410) -C (49) -C (413)  | 127.8 (9)   | C (611) -B (6) -C (631)   | 113.5 (6)   |
| N (48) -C (49) -C (413)   | 109.5 (7)   | C (641) -B (6) -C (631)   | 102.7 (6)   |
| C (411) -C (410) -C (49)  | 118.40 (11) | C (612) -C (611) -C (616) | 115.2 (8)   |
| C (410) -C (411) -C (412) | 122.70 (12) | C (612) -C (611) -B (6)   | 125.3 (7)   |
| C (47) -C (412) -C (411)  | 118.50 (11) | C (616) -C (611) -B (6)   | 119.4 (7)   |
| C (418) -C (413) -N (414) | 121.7 (9)   | C (611) -C (612) -C (613) | 121.4 (9)   |
| C (418) -C (413) -C (49)  | 122.1 (8)   | C (614) -C (613) -C (612) | 121.10 (11) |
| N (414) -C (413) -C (49)  | 116.2 (7)   | C (613) -C (614) -C (615) | 119.0 (1)   |
| C (415) -N (414) -C (413) | 118.5 (8)   | C (616) -C (615) -C (614) | 119.5 (1)   |
| C (415) -N (414) -RU3     | 127.9 (5)   | C (615) -C (616) -C (611) | 123.8 (9)   |
| C (413) -N (414) -RU3     | 113.6 (6)   | C (622) -C (621) -C (626) | 113.2 (8)   |
| N (414) -C (415) -C (416) | 122.7 (9)   | C (622) -C (621) -B (6)   | 123.0 (7)   |
| C (415) -C (416) -C (417) | 119.9 (1)   | C (626) -C (621) -B (6)   | 123.4 (7)   |
| C (418) -C (417) -C (416) | 115.9 (9)   | C (621) -C (622) -C (623) | 124.2 (9)   |
| C (413) -C (418) -C (417) | 121.4 (9)   | C (624) -C (623) -C (622) | 118.50 (11) |
| C (521) -B (5) -C (541)   | 114.6 (6)   | C (623) -C (624) -C (625) | 119.10 (11) |
| C (521) -B (5) -C (531)   | 104.8 (6)   | C (626) -C (625) -C (624) | 120.60 (11) |
| C (541) -B (5) -C (531)   | 109.1 (6)   | C (625) -C (626) -C (621) | 124.3 (9)   |
| C (521) -B (5) -C (511)   | 111.5 (6)   | C (636) -C (631) -C (632) | 118.6 (8)   |
| C (541) -B (5) -C (511)   | 103.6 (6)   | C (636) -C (631) -B (6)   | 120.8 (7)   |
| C (531) -B (5) -C (511)   | 113.5 (6)   | C (632) -C (631) -B (6)   | 120.4 (7)   |
| C (516) -C (511) -C (512) | 117.0 (7)   | C (631) -C (632) -C (633) | 120.2 (9)   |
| C (516) -C (511) -B (5)   | 122.1 (6)   | C (634) -C (633) -C (632) | 117.10 (11) |
| C (512) -C (511) -B (5)   | 120.5 (7)   | C (635) -C (634) -C (633) | 121.70 (11) |
| C (513) -C (512) -C (511) | 122.6 (8)   | C (634) -C (635) -C (636) | 118.50 (11) |
| C (512) -C (513) -C (514) | 119.2 (8)   | C (631) -C (636) -C (635) | 123.6 (1)   |
| C (515) -C (514) -C (513) | 120.0 (8)   | C (646) -C (641) -C (642) | 114.7 (7)   |
| C (514) -C (515) -C (516) | 118.7 (8)   | C (646) -C (641) -B (6)   | 121.7 (7)   |
| C (511) -C (516) -C (515) | 122.5 (8)   | C (642) -C (641) -B (6)   | 123.3 (7)   |
| C (526) -C (521) -C (522) | 116.2 (8)   | C (643) -C (642) -C (641) | 123.0 (8)   |
| C (526) -C (521) -B (5)   | 121.8 (7)   | C (644) -C (643) -C (642) | 121.1 (8)   |
| C (522) -C (521) -B (5)   | 121.6 (7)   | C (643) -C (644) -C (645) | 117.9 (9)   |
| C (523) -C (522) -C (521) | 119.2 (8)   | C (644) -C (645) -C (646) | 120.3 (9)   |
| C (522) -C (523) -C (524) | 125.8 (1)   | C (641) -C (646) -C (645) | 122.8 (8)   |
| C (525) -C (524) -C (523) | 114.3 (1)   | C (711) -B (7) -C (731)   | 112.5 (7)   |
| C (526) -C (525) -C (524) | 123.8 (1)   | C (711) -B (7) -C (721)   | 115.8 (7)   |
| C (525) -C (526) -C (521) | 120.5 (9)   | C (731) -B (7) -C (721)   | 104.7 (7)   |
| C (532) -C (531) -C (536) | 114.8 (7)   | C (711) -B (7) -C (741)   | 103.7 (6)   |
| C (532) -C (531) -B (5)   | 119.9 (7)   | C (731) -B (7) -C (741)   | 111.3 (7)   |
| C (536) -C (531) -B (5)   | 125.2 (7)   | C (721) -B (7) -C (741)   | 108.9 (7)   |
| C (533) -C (532) -C (531) | 123.3 (8)   | C (716) -C (711) -C (712) | 112.3 (9)   |
| C (532) -C (533) -C (534) | 120.7 (9)   | C (716) -C (711) -B (7)   | 126.4 (8)   |
| C (535) -C (534) -C (533) | 117.8 (9)   | C (712) -C (711) -B (7)   | 121.0 (8)   |
| C (534) -C (535) -C (536) | 119.6 (9)   | C (711) -C (712) -C (713) | 125.1 (9)   |
| C (531) -C (536) -C (535) | 123.9 (8)   | C (714) -C (713) -C (712) | 116.4 (1)   |
| C (542) -C (541) -C (546) | 116.1 (7)   | C (715) -C (714) -C (713) | 122.20 (11) |
| C (542) -C (541) -B (5)   | 122.8 (7)   | C (714) -C (715) -C (716) | 118.5 (1)   |
| C (546) -C (541) -B (5)   | 120.8 (7)   | C (711) -C (716) -C (715) | 125.3 (1)   |
| C (543) -C (542) -C (541) | 121.9 (8)   | C (726) -C (721) -C (722) | 113.6 (8)   |
| C (542) -C (543) -C (544) | 122.8 (1)   | C (726) -C (721) -B (7)   | 123.4 (8)   |
| C (543) -C (544) -C (545) | 116.0 (8)   | C (722) -C (721) -B (7)   | 122.7 (8)   |
| C (546) -C (545) -C (544) | 121.1 (7)   | C (721) -C (722) -C (723) | 122.7 (9)   |
| C (545) -C (546) -C (541) | 122.0 (8)   | C (724) -C (723) -C (722) | 119.8 (1)   |
| C (621) -B (6) -C (611)   | 104.9 (6)   | C (723) -C (724) -C (725) | 121.30 (11) |
| C (621) -B (6) -C (641)   | 114.8 (6)   | C (724) -C (725) -C (726) | 117.50 (11) |
| C (611) -B (6) -C (641)   | 111.1 (6)   | C (721) -C (726) -C (725) | 125.0 (9)   |
| C (621) -B (6) -C (631)   | 110.2 (6)   | C (736) -C (731) -C (732) | 113.5 (9)   |

|                      |            |                      |          |
|----------------------|------------|----------------------|----------|
| C(736)-C(731)-B(7)   | 125.6(9)   | C(834)-C(835)-C(836) | 122.1(9) |
| C(732)-C(731)-B(7)   | 120.4(9)   | C(835)-C(836)-C(831) | 119.7(9) |
| C(731)-C(732)-C(733) | 126.10(12) | C(842)-C(841)-C(846) | 113.1(8) |
| C(734)-C(733)-C(732) | 111.90(12) | C(842)-C(841)-B(8)   | 121.9(7) |
| C(735)-C(734)-C(733) | 128.60(13) | C(846)-C(841)-B(8)   | 124.6(7) |
| C(734)-C(735)-C(736) | 113.00(12) | C(841)-C(842)-C(843) | 126.3(8) |
| C(731)-C(736)-C(735) | 126.00(11) | C(842)-C(843)-C(844) | 117.4(8) |
| C(746)-C(741)-C(742) | 115.4(7)   | C(845)-C(844)-C(843) | 120.2(9) |
| C(746)-C(741)-B(7)   | 120.1(7)   | C(844)-C(845)-C(846) | 118.0(9) |
| C(742)-C(741)-B(7)   | 124.2(7)   | C(845)-C(846)-C(841) | 124.7(8) |
| C(743)-C(742)-C(741) | 121.7(9)   | F(16)-P(1)-F(14)     | 89.6(4)  |
| C(742)-C(743)-C(744) | 122.0(9)   | F(16)-P(1)-F(12)     | 90.1(4)  |
| C(745)-C(744)-C(743) | 118.2(9)   | F(14)-P(1)-F(12)     | 179.0(4) |
| C(744)-C(745)-C(746) | 119.1(9)   | F(16)-P(1)-F(15)     | 89.9(4)  |
| C(741)-C(746)-C(745) | 123.6(8)   | F(14)-P(1)-F(15)     | 91.3(3)  |
| C(821)-B(8)-C(841)   | 111.1(7)   | F(12)-P(1)-F(15)     | 89.7(3)  |
| C(821)-B(8)-C(811)   | 114.0(7)   | F(16)-P(1)-F(13)     | 90.9(4)  |
| C(841)-B(8)-C(811)   | 104.7(6)   | F(14)-P(1)-F(13)     | 88.4(3)  |
| C(821)-B(8)-C(831)   | 103.8(6)   | F(12)-P(1)-F(13)     | 90.6(3)  |
| C(841)-B(8)-C(831)   | 113.4(7)   | F(15)-P(1)-F(13)     | 179.1(5) |
| C(811)-B(8)-C(831)   | 110.1(7)   | F(16)-P(1)-F(11)     | 179.7(5) |
| C(816)-C(811)-C(812) | 115.4(7)   | F(14)-P(1)-F(11)     | 90.2(4)  |
| C(816)-C(811)-B(8)   | 121.4(7)   | F(12)-P(1)-F(11)     | 90.1(3)  |
| C(812)-C(811)-B(8)   | 122.9(7)   | F(15)-P(1)-F(11)     | 90.1(4)  |
| C(813)-C(812)-C(811) | 121.9(7)   | F(13)-P(1)-F(11)     | 89.1(4)  |
| C(812)-C(813)-C(814) | 120.0(9)   | F(24)-P(2)-F(25)     | 91.0(5)  |
| C(815)-C(814)-C(813) | 118.8(9)   | F(24)-P(2)-F(21)     | 88.9(5)  |
| C(814)-C(815)-C(816) | 121.0(8)   | F(25)-P(2)-F(21)     | 86.8(4)  |
| C(815)-C(816)-C(811) | 122.7(8)   | F(24)-P(2)-F(23)     | 90.6(5)  |
| C(822)-C(821)-C(826) | 113.2(8)   | F(25)-P(2)-F(23)     | 174.7(6) |
| C(822)-C(821)-B(8)   | 124.3(8)   | F(21)-P(2)-F(23)     | 88.2(5)  |
| C(826)-C(821)-B(8)   | 122.5(8)   | F(24)-P(2)-F(22)     | 178.9(6) |
| C(823)-C(822)-C(821) | 123.6(1)   | F(25)-P(2)-F(22)     | 88.8(5)  |
| C(824)-C(823)-C(822) | 120.00(11) | F(21)-P(2)-F(22)     | 92.2(5)  |
| C(823)-C(824)-C(825) | 122.10(11) | F(23)-P(2)-F(22)     | 89.7(5)  |
| C(824)-C(825)-C(826) | 117.50(11) | F(24)-P(2)-F(26)     | 94.3(5)  |
| C(825)-C(826)-C(821) | 123.5(1)   | F(25)-P(2)-F(26)     | 90.9(5)  |
| C(832)-C(831)-C(836) | 114.5(8)   | F(21)-P(2)-F(26)     | 176.1(5) |
| C(832)-C(831)-B(8)   | 122.9(8)   | F(23)-P(2)-F(26)     | 94.1(5)  |
| C(836)-C(831)-B(8)   | 122.5(7)   | F(22)-P(2)-F(26)     | 84.7(5)  |
| C(831)-C(832)-C(833) | 125.0(9)   |                      |          |
| C(834)-C(833)-C(832) | 118.1(1)   |                      |          |
| C(835)-C(834)-C(833) | 120.4(1)   |                      |          |

**Table S6.** Bond lengths [ $\text{\AA}$ ] and angles [ $^\circ$ ] related to the hydrogen bonding for **1**.

| D-H           | . . A    | d(D-H) | d(H. . A) | d(D. . A) | <DHA  |
|---------------|----------|--------|-----------|-----------|-------|
| N(326)-H(326) | F(15) #1 | 0.87   | 1.98      | 2.845(9)  | 173.9 |
| N(330)-H(330) | F(21) #2 | 0.87   | 2.26      | 3.055(11) | 152.4 |
| N(330)-H(330) | F(25) #2 | 0.87   | 2.36      | 3.004(11) | 131.5 |
